# Supplementary material for: Police officers’ work–life balance, job satisfaction and quality of life: longitudinal effects after changing the shift schedule
Source: PubMed Central journal article supplement — BMJ Open. 2022 Sep 20;12(9):e063302. doi: 10.1136/bmjopen-2022-063302 (PMC9490605; doi:10.1136/bmjopen-2022-063302), 2022-09-20
Supplement: bmjopen-2022-063302.draft_revisions.pdf [file bmjopen-2022-063302.draft_revisions.pdf]

# BMJ Open

BMJ Open is committed to open peer review. As part of this commitment we make the peer review history of every article we publish publicly available.

When an article is published we post the peer reviewers' comments and the authors' responses online. We also post the versions of the paper that were used during peer review. These are the versions that the peer review comments apply to.

The versions of the paper that follow are the versions that were submitted during the peer review process. They are not the versions of record or the final published versions. They should not be cited or distributed as the published version of this manuscript.

BMJ Open is an open access journal and the full, final, typeset and author-corrected version of record of the manuscript is available on our site with no access controls, subscription charges or pay-per-view fees (<http://bmjopen.bmj.com>).

If you have any questions on BMJ Open's open peer review process please email [info.bmjopen@bmj.com](mailto:info.bmjopen@bmj.com)

# BMJ Open

## Police officers' work-life balance, job satisfaction and quality of life – Longitudinal effects after changing the shift schedule

|                               |                                                                                                                                                                                                                                                                                                                                                                                                                                                                                                                                                                                                                                                                                                                                                                                                                      |
|-------------------------------|----------------------------------------------------------------------------------------------------------------------------------------------------------------------------------------------------------------------------------------------------------------------------------------------------------------------------------------------------------------------------------------------------------------------------------------------------------------------------------------------------------------------------------------------------------------------------------------------------------------------------------------------------------------------------------------------------------------------------------------------------------------------------------------------------------------------|
| Journal:                      | <i>BMJ Open</i>                                                                                                                                                                                                                                                                                                                                                                                                                                                                                                                                                                                                                                                                                                                                                                                                      |
| Manuscript ID                 | bmjopen-2022-063302                                                                                                                                                                                                                                                                                                                                                                                                                                                                                                                                                                                                                                                                                                                                                                                                  |
| Article Type:                 | Original research                                                                                                                                                                                                                                                                                                                                                                                                                                                                                                                                                                                                                                                                                                                                                                                                    |
| Date Submitted by the Author: | 29-Mar-2022                                                                                                                                                                                                                                                                                                                                                                                                                                                                                                                                                                                                                                                                                                                                                                                                          |
| Complete List of Authors:     | Rohwer, Elisabeth; University Medical Center Hamburg-Eppendorf, Institute for Occupational and Maritime Medicine<br>Velasco Garrido, Marcial; Universitätsklinikum Hamburg-Eppendorf, Institute for Occupational and Maritime Health<br>Herold, Robert; University Medical Center Hamburg-Eppendorf, Institute for Occupational and Maritime Medicine<br>Preisser, A; University Medical Centre Hamburg-Eppendorf, Institute for Occupational and Maritime Medicine<br>Terschüren, Claudia; University Medical Center Hamburg-Eppendorf, Institute for Occupational and Maritime Medicine<br>Harth, Volker; Universitätsklinikum Hamburg-Eppendorf, Institute for Occupational and Maritime Health<br>Mache, Stefanie; University Medical Center Hamburg-Eppendorf, Institute for Occupational and Maritime Medicine |
| Keywords:                     | OCCUPATIONAL & INDUSTRIAL MEDICINE, MENTAL HEALTH, EPIDEMIOLOGY                                                                                                                                                                                                                                                                                                                                                                                                                                                                                                                                                                                                                                                                                                                                                      |
|                               |                                                                                                                                                                                                                                                                                                                                                                                                                                                                                                                                                                                                                                                                                                                                                                                                                      |

SCHOLARONE™  
Manuscripts

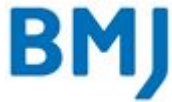

I, the Submitting Author has the right to grant and does grant on behalf of all authors of the Work (as defined in the below author licence), an exclusive licence and/or a non-exclusive licence for contributions from authors who are: i) UK Crown employees; ii) where BMJ has agreed a CC-BY licence shall apply, and/or iii) in accordance with the terms applicable for US Federal Government officers or employees acting as part of their official duties; on a worldwide, perpetual, irrevocable, royalty-free basis to BMJ Publishing Group Ltd ("BMJ") its licensees and where the relevant Journal is co-owned by BMJ to the co-owners of the Journal, to publish the Work in this journal and any other BMJ products and to exploit all rights, as set out in our [licence](#).

The Submitting Author accepts and understands that any supply made under these terms is made by BMJ to the Submitting Author unless you are acting as an employee on behalf of your employer or a postgraduate student of an affiliated institution which is paying any applicable article publishing charge ("APC") for Open Access articles. Where the Submitting Author wishes to make the Work available on an Open Access basis (and intends to pay the relevant APC), the terms of reuse of such Open Access shall be governed by a Creative Commons licence – details of these licences and which [Creative Commons](#) licence will apply to this Work are set out in our licence referred to above.

Other than as permitted in any relevant BMJ Author's Self Archiving Policies, I confirm this Work has not been accepted for publication elsewhere, is not being considered for publication elsewhere and does not duplicate material already published. I confirm all authors consent to publication of this Work and authorise the granting of this licence.

POLICE OFFICERS' WORK-LIFE BALANCE

1  
2  
3  
4  
5 1 **POLICE OFFICERS' WORK-LIFE BALANCE, JOB**  
6  
7 2 **SATISFACTION AND QUALITY OF LIFE – LONGITUDINAL**  
8  
9  
10 3 **EFFECTS AFTER CHANGING THE SHIFT SCHEDULE**  
11  
12

13 4 Elisabeth Rohwer, Marcial Velasco Garrido, Robert Herold, Alexandra M. Preisser, Claudia  
14 5 Terschüren, Volker Harth, Stefanie Mache

16 6 Institute for Occupational and Maritime Medicine, University Medical Center Hamburg-Eppendorf,  
17 7 Hamburg, Germany

19 8 Correspondence to Elisabeth Rohwer; [e.rohwer@uke.de](mailto:e.rohwer@uke.de), Seewartenstr. 10, Hs. 1, 20459 Hamburg,  
20 9 Germany  
21  
22

23  
24 10  
25  
26  
27  
28  
29  
30  
31  
32  
33  
34  
35  
36  
37  
38  
39  
40  
41  
42  
43  
44  
45  
46  
47  
48  
49  
50  
51  
52  
53  
54  
55  
56  
57  
58  
59  
60

## POLICE OFFICERS' WORK-LIFE BALANCE

## ABSTRACT

**Objectives:** To evaluate mental health-related outcomes of police officers five and a half years after implementing a new alternating shift schedule which was supposed to improve their health and work-life balance.

**Design:** Pre-post study design with a baseline survey at the beginning of the piloting of the new shift schedule in 2015 and another survey five and a half years later in 2020.

**Setting:** Police departments of a German metropolitan police force piloting the new shift schedule.

**Participants:** 116 shift-working police officers out of a population of 1673 police officers at the follow-up date.

**Interventions:** New shift schedule based on occupational health recommendations.

**Outcomes measures:** Work-life balance, job satisfaction and quality of life.

**Methods:** Mixed analyses of variances were used to test the hypotheses of within- and between-subject differences with regard to time and gender.

**Results:** We found partly significant differences between the baseline and follow-up survey for work-life balance ( $F(1, 114) = 6.168, p = .014, \eta_p^2 = .051$ ), job satisfaction ( $F(1, 114) = 9.921, p = .002, \eta_p^2 = .080$ ) and quality of life ( $F(1, 114) = .593, p = .443, \eta_p^2 = .005$ ). Neither significant differences between male and female police officers nor interaction effects of time and gender were found.

**Conclusion:** An increase was found for each of the three outcomes five and a half years after implementing the new shift schedule. The results contribute to the current state of research on mental health-related outcomes of working conditions in shift work. On this basis, recommendations for designing shift schedules can be deduced to promote mental health and job satisfaction for employees in shift work.

## STRENGTHS AND LIMITATIONS OF THIS STUDY

- This study used longitudinal data to examine changes in mental health-related outcomes among shift-working police officers before and after implementing a new shift schedule.
- The results contribute to a deeper understanding of mental health outcomes associated with working conditions in shift schedules.
- The study was designed and conducted by an interdisciplinary team of psychologists, occupational physicians, health scientists and epidemiologists.

## POLICE OFFICERS' WORK-LIFE BALANCE

- 1  
2  
3  
40 • Only a small proportion of the surveyed police officers could be matched over the measurement  
4  
5 41 points, resulting in a reduced sample size and limited representativity of results.  
6  
7  
8  
9  
10  
11  
12  
13  
14  
15  
16  
17  
18  
19  
20  
21  
22  
23  
24  
25  
26  
27  
28  
29  
30  
31  
32  
33  
34  
35  
36  
37  
38  
39  
40  
41  
42  
43  
44  
45  
46  
47  
48  
49  
50  
51  
52  
53  
54  
55  
56  
57  
58  
59  
60
- Only a small proportion of the surveyed police officers could be matched over the measurement points, resulting in a reduced sample size and limited representativity of results.

For peer review only

## INTRODUCTION

Police officers are exposed to various work-related demands in their jobs, with shift work being an inevitable one of them. Working in shifts, especially at night, is associated with several health risks, such as higher incidences of cardio-vascular diseases resulting from a disturbed circadian rhythm<sup>1-3</sup> and a potentially increased risk of cancer due to impaired melatonin secretion<sup>4-7</sup>. Furthermore, alternating shift work is associated with increased risk of sleep disturbances<sup>8</sup>, impaired mood and performance, and disrupted family and social relationships, which in turn can have a negative impact on physical and mental health<sup>9-13</sup>. Balancing work and leisure activities, such as partnership, family, caring for relatives, hobbies or voluntary work, thus poses a particular challenge for employees working in alternating shifts<sup>14</sup>. Among shift-working police officers, work-family conflict has already been associated with higher levels of job dissatisfaction<sup>15-18</sup>, burnout and stress<sup>19-21</sup>, more subjective health complaints and even suicidal ideation<sup>22</sup>. Although significant gender differences, in general, but especially among police officers who were married and/or had children, were found regarding psychosocial stress<sup>23</sup>, further research findings highlight the significant relationship between stress and work-life balance<sup>24</sup> or work-family conflict<sup>25 26</sup> affecting police officers regardless of their gender. Similarly, several studies indicate that gender does neither predict police officers' job satisfaction nor differ significantly between males and females<sup>27-29</sup>, although contradictory results have been found<sup>30 31</sup>. Literature also provides inconsistent findings on police officers' gender and perceived quality of life. A Greek study suggests that female and male police officers' scores do not differ significantly overall, but females reported lower levels of subscales of health-related quality of life which is – like job satisfaction – negatively associated with perceived stress. However, significant interactions were not revealed<sup>31</sup>. Other studies have found no significant gender differences concerning police officers' quality of life<sup>32</sup>. However, research on police officers' quality of life is only recently emerging<sup>33 34</sup>. In this context, an evaluation at a German metropolitan police force revealed an improved work-life balance among police officers after adapting the shift schedule according to occupational health recommendations<sup>35 36</sup>. Especially flexibility due to improved planning of free time and shorter shifts were regarded as more compatible with family and leisure time activities<sup>36</sup>. In a similar vein, a German metropolitan police force aspired to adapt their alternating shift schedule and evaluate their newly-developed shift schedule to improve their employees' health, work-life balance, job satisfaction and general health. The shift schedule was thus changed from a four-week rotation with 35 to 49 hours of work per week to an eight-week rhythm with 36 to 48 hours of work per week. The early duty week with six consecutive early mornings, at 5:30 a.m. and one Sunday off was abolished. Previously alternating day, late and night shifts, with 12.25 hours-day and night shifts in three subsequent weeks and days off (so-called "sleep-in days") after night shifts following this early duty week were replaced

## POLICE OFFICERS' WORK-LIFE BALANCE

1  
2  
3 76 by two night shifts followed by two or three days off each week, resulting in at least one day off after  
4 77 the "sleep-in day". In contrast to the previous shift schedule, the new system also stipulated  
5 78 guaranteed days off without availability for special operations. 12-hour day and night shifts now  
6 79 usually occurred twice a week, in some weeks only once. A comparison of both shift schedule models  
7 80 with regard to occupational health recommendations is provided in the supplementary materials'  
8 81 Table S1.

## 82 Objectives and hypotheses

83 As described above, the current state of research provides evidence that shift work can lead to work-  
84 family conflicts and affect mental health and job satisfaction among police officers. However, there is  
85 considerably less longitudinal research data demonstrating the effects of shift work systems on work-  
86 and health-related outcomes. As part of a broader evaluation of the potential effects of the new shift  
87 schedule on the working conditions at the metropolitan police, the aim of this study was to investigate  
88 within-and between-subject psychological effects of the new shift schedule. Further results of  
89 occupational health analyses<sup>37</sup> as well as analyses of sickness absence rates<sup>38</sup> are presented in separate  
90 articles. Within the evaluation process of the new shift schedule we thus explored in the present study:  
91 How does the newly-introduced shift schedule impact police officers' work-life balance, job  
92 satisfaction and quality of life? Is there a significant difference in work-life balance, job satisfaction and  
93 quality of life at the two time points before and after implementing the new shift schedule or regarding  
94 their gender?

95 In light of the state of research outlined above, we accordingly formulated the following hypotheses:

96 H<sub>1a</sub>: Police officers' perceived work-life balance will be significantly higher rated five and a half years  
97 after implementing the new shift schedule.

98 H<sub>1b</sub>: There will be no significant main effect of gender on police officers' perceived work-life balance.

99 H<sub>1c</sub>: There will be no significant interaction effect of police officers' gender and time on their perceived  
100 work-life balance.

101 H<sub>2a</sub>: Police officers' job satisfaction will be significantly higher five and a half years after implementing  
102 the new shift schedule.

103 H<sub>2b</sub>: There will be no significant main effect of gender on police officers' job satisfaction.

104 H<sub>2c</sub>: There will be no significant interaction effect of police officers' gender and time on their job  
105 satisfaction.

106 H<sub>3a</sub>: Police officers' perceived quality of life will be significantly higher five and a half years after  
107 implementing the new shift schedule.

108 H<sub>3b</sub>: There will be no significant main effect of gender on police officers' perceived quality of life.



## POLICE OFFICERS' WORK-LIFE BALANCE

109 H<sub>3c</sub>: There will be no significant interaction effect of police officers' gender and time on their perceived  
110 quality of life.

## 111 METHODS

### 112 Study design, population and recruitment

113 The newly-proposed shift schedule was piloted in a German metropolitan police force in a successive  
114 roll-out across all police stations (PS). In May 2015, the first metropolitan PS introduced the new shift  
115 schedule, followed by six other PS until the end of 2015. 16 further PS and the operations centre  
116 introduced the new shift schedule until September 2017, one last PS changed their shift schedule in  
117 the beginning of 2021. Data were collected at three time points using questionnaires. Only police  
118 officers of four relevant duty groups who worked in the alternating shift schedule were included in the  
119 study. Participating police officers worked at PS across the metropolitan area or the operations centre  
120 where emergency calls are received and handled. The first survey took place shortly before the piloting  
121 of the new rotating shift schedule started in May 2015 (T0), the second survey was conducted one year  
122 later, in June 2016 (T1), followed by the third survey was scheduled exactly five years later in May 2020  
123 but had to be postponed to December 2020 and early January 2021 due to the SARS-CoV-2 pandemic  
124 (T2). Each time, standardised questionnaires with a covering letter were distributed via the official post  
125 boxes to all police officers of the metropolitan police force working rotating shifts and belonging to the  
126 predefined duty groups. Participants were asked to provide an individual matching code based on  
127 digits and letters. The completed questionnaires could be placed anonymously in sealed ballot boxes  
128 within four weeks. The paper questionnaires were then digitised with the data collection software  
129 TeleForm® (Electric Paper Informationssysteme GmbH, Lüneburg, Germany). Despite the consistently  
130 high response rates, owing to lack of consent, many retirements and new recruitments of police  
131 officers in the meantime, only 127 participants could be matched between T0 and T2. A further  
132 matching with T1-participants would have resulted in a sample size too small to analyse. Therefore,  
133 only police officers participating in the baseline (T0) and follow-up (T2) surveys were matched. A  
134 flowchart of this process is provided in Figure 1.

135 ---- insert Figure 1 here ----

### 136 Measures

#### 137 Sociodemographic and job characteristics

138 We gathered information on participants' gender, age, rank within the police force, shift work  
139 experience, type of employment and duty service, relationship status and number of children as well  
140 as being a single parent or caring for relatives or others.

## POLICE OFFICERS' WORK-LIFE BALANCE

141 **Work-life balance**

142 Work-life balance was measured with five items which were already deployed and considered reliable  
143 (Cronbach's  $\alpha = .92$ ) in a similar survey of another German metropolitan police force<sup>36</sup>. A sample item  
144 was "The coordination of my daily work routine with my private matters works well." All items were  
145 rated on a five-point Likert scale (1 = "I fully agree" to 5 = "I do not agree") and calculated as a score  
146 ranging from 0 (worst work-life balance) to 100 (best possible work-life balance).

147 **Job satisfaction**

148 We measured job satisfaction with seven items of the German version of the Copenhagen Psychosocial  
149 Questionnaire (COPSOQ) job satisfaction scale<sup>39</sup>. The items were presented on a four-point Likert scale,  
150 ranging from 1 = "very satisfied" to 4 = "very unhappy". A sample item was "Regarding your work in  
151 general. How pleased are you with your job as a whole, everything taken into consideration?" A score  
152 was computed based on the items, ranging from 0 (lowest job satisfaction) to 100 (highest job  
153 satisfaction). Both, the original and the latest COPSOQ study confirmed the German scale's validity and  
154 reliability (Cronbach's  $\alpha$  ranging from .79 to .82)<sup>39 40</sup>.

155 **Quality of life**

156 Quality of life was assessed using two items of the World Health Organization's questionnaire  
157 WHOQOL-Bref to calculate its global score ranging from 0 (worst quality of life) to 100 (best quality of  
158 life)<sup>41</sup>. Participants responded to the questions "Over the last two weeks, how would you rate your  
159 quality of life?" and "Over the last two weeks, how satisfied were you with your health?" on a scale  
160 from 1 = "very bad/unsatisfied" to 5 = "very good/satisfied". The instrument in its short version can be  
161 considered reliable (Cronbach's  $\alpha$  ranging from .57 to .88) and valid<sup>41</sup>.

162 **Statistical analyses**

163 After calculating the scores for work-life balance and job satisfaction, the data were tested regarding  
164 the assumptions of a mixed analysis of variance (mixed ANOVA). After a check for missing values and  
165 multivariate outliers, 11 cases were excluded, resulting in a final sample size of  $N = 116$ . Although most  
166 of the normality tests (Kolmogorov-Smirnov and Shapiro-Wilk) indicated no normality of the data,  
167 based on the sample size ( $N = 116$ ,  $n > 30$  for each group), normal Q-Q plots, skewness and kurtosis  
168 values ( $< 1.0$ ), bivariate normal distribution of data could be assumed. The Pearson correlation matrix  
169 further indicated no multicollinearity ( $r < .63$ ). Box's test indicated homogeneity of covariance matrices  
170 ( $p > .05$ ) and Levene's tests indicated homoscedasticity ( $p > .05$ ) in all mixed ANOVA. Mauchly's test  
171 for sphericity was non-significant due to the analysis of two time points. Cohen's  $d$  was calculated from  
172  $\eta_p^2$  and used to evaluate the effect sizes, considering  $d = .20$  as a small effect,  $d = .50$  as a medium  
173 effect, and  $d = .80$  as a large effect<sup>42</sup>. In addition, mean scores and standard deviations were calculated

## POLICE OFFICERS' WORK-LIFE BALANCE

174 for each time point individually and a sensitivity analysis was conducted for the follow-up survey (T2)  
 175 to account for the different lengths of time police officers had worked with the new shift schedule (in  
 176 months) as a covariate. All statistical analyses were performed with IBM® SPSS® Statistics (version 25;  
 177 IBM Corp; Armonk, New York, USA),  $p < 0.05$  was considered as significant.

## 178 Patient and Public involvement

179 Patients or the public were not involved in the design, conduct, reporting or dissemination plans of our  
 180 research.

## 181 Ethical considerations

182 The study was approved by the Ethics Review Committee of the Hamburg Medical Association,  
 183 Germany (PV4999 / WF-009/20). All participants provided informed consent for data collection after  
 184 receiving information on data protection and analysis. Participants who did not provide informed  
 185 consent were excluded from data analysis.

## 186 RESULTS

### 187 Participant characteristics

188 The majority of participants were male (70.7%). Most of the participating police officers were aged  
 189 between 35 and 39 years (21.6 %; also median and modal age category) and worked in upper police  
 190 service (65.5%). Two thirds of them had already worked in shift work for more than ten years (66.4%).  
 191 Almost 90% worked fulltime and 68% had been predominantly on patrol duty in the past weeks before  
 192 completing the survey. Participants also mostly lived in a permanent relationship (83.6%) and had at  
 193 least one child (60.3%). Only less than 2% were single parents and slightly more (2.6%) cared for  
 194 relatives or others alongside their job. Police officers' sociodemographic characteristics at baseline (T0)  
 195 are provided in more detail in Table 1.

196 **Table 1. Sociodemographic characteristics of participants at baseline T0 (N = 116).**

| Characteristics | <i>n</i> | %    |
|-----------------|----------|------|
| Gender          |          |      |
| Male            | 82       | 70.7 |
| Female          | 34       | 29.3 |
| Age             |          |      |
| 20-24 years     | 4        | 3.4  |
| 25-29 years     | 16       | 13.8 |
| 30-34 years     | 19       | 16.4 |
| 35-39 years     | 25       | 21.6 |
| 40-44 years     | 15       | 12.9 |

## POLICE OFFICERS' WORK-LIFE BALANCE

|                                          |     |      |
|------------------------------------------|-----|------|
| 45-49 years                              | 17  | 14.7 |
| 50-54 years                              | 19  | 16.4 |
| ≥ 55 years                               | 1   | .9   |
| Rank                                     |     |      |
| Intermediate police service              | 40  | 34.5 |
| Upper police service                     | 76  | 65.5 |
| Shift work experience                    |     |      |
| ≤ 5 years                                | 21  | 18.1 |
| 5-10 years                               | 18  | 15.5 |
| ≥ 10 years                               | 77  | 66.4 |
| Type of employment                       |     |      |
| Part-time                                | 12  | 10.3 |
| Fulltime                                 | 104 | 89.7 |
| Type of duty service <sup>1</sup>        |     |      |
| Exclusively office duty                  | 22  | 19.0 |
| Predominantly office duty                | 8   | 6.9  |
| Office and patrol duty (50:50)           | 7   | 6.0  |
| Predominantly patrol duty                | 79  | 68.1 |
| Permanent relationship                   |     |      |
| Yes                                      | 97  | 83.6 |
| No                                       | 18  | 15.5 |
| No information given                     | 1   | .9   |
| Children                                 |     |      |
| None                                     | 46  | 39.7 |
| One child                                | 20  | 17.2 |
| Two children                             | 35  | 30.2 |
| Three children                           | 12  | 10.3 |
| Four children                            | 3   | 2.6  |
| Single parent                            |     |      |
| Yes                                      | 2   | 1.7  |
| No                                       | 100 | 86.2 |
| No information given                     | 14  | 12.1 |
| Caring for relatives/others              |     |      |
| Yes                                      | 3   | 2.6  |
| No                                       | 113 | 97.4 |
| Time working with the new shift schedule |     |      |
| ≤ 24 months                              | 4   | 4.1  |
| 25-48 months                             | 31  | 26.7 |
| ≥ 49 months                              | 63  | 54.3 |
| No information                           | 18  | 15.5 |

197 Note. <sup>1</sup>Refers to type of service exercised in the last four weeks prior to taking the survey.

198 Descriptive statistics at all three time points indicated increasing mean scores with each survey. Work-  
 199 life balance, job satisfaction and quality of life have been rated higher consecutively at each time point.  
 200 For work-life balance and job satisfaction, the difference of means was greater over the longer period  
 201 between T1 and T2 compared to T0 and T1. For quality of life, by contrast, the difference was greater  
 202 between T0 and T1, whereas between T1 and T2 only a smaller difference of the mean could be  
 203 observed, as displayed in Table S2 in the supplementary material.

## POLICE OFFICERS' WORK-LIFE BALANCE

204 **Within-subjects effects of time**

205 The descriptive cross-sectional findings of each measurement point were also found in the matched  
 206 sample of baseline and follow-up mean scores we used for the principal analyses. Means of all three  
 207 dependent variables were higher at T2 than at T0 (see Table 2). The mixed ANOVA revealed significant  
 208 small and medium-sized main effects for the within-subjects effects on police officers' work-life  
 209 balance ( $F(1, 114) = 6.168, p = .014, \eta_p^2 = .051, d = .464$ ) and job satisfaction ( $F(1, 114) = 9.921, p = .002,$   
 210  $\eta_p^2 = .080, d = .590$ ), thereby confirming hypotheses H<sub>1a</sub> and H<sub>2a</sub>. The main effect for quality of life was  
 211 not significant ( $F(1, 114) = .593, p = .443, \eta_p^2 = .005$ ). Hypothesis H<sub>3a</sub> thus had to be rejected.

212 **Table 2. Means and standard deviations for work-life balance, job satisfaction and quality of life (N**  
 213 **= 116).**

|           |                      | Work-life balance |           | Job satisfaction |           | Quality of life |           |
|-----------|----------------------|-------------------|-----------|------------------|-----------|-----------------|-----------|
|           |                      | <i>M</i>          | <i>SD</i> | <i>M</i>         | <i>SD</i> | <i>M</i>        | <i>SD</i> |
| <b>T0</b> | Males <sup>1</sup>   | 50.305            | 21.305    | 66.148           | 11.538    | 62.805          | 17.675    |
|           | Females <sup>2</sup> | 57.794            | 22.670    | 65.314           | 10.308    | 65.809          | 19.294    |
|           | Total                | 52.500            | 21.884    | 65.904           | 11.153    | 63.685          | 18.131    |
| <b>T2</b> | Males <sup>1</sup>   | 59.817            | 24.145    | 70.635           | 12.637    | 64.787          | 18.750    |
|           | Females <sup>2</sup> | 63.971            | 21.098    | 70.777           | 12.370    | 67.647          | 22.638    |
|           | Total                | 61.034            | 23.280    | 70.677           | 12.506    | 65.625          | 19.910    |

214 Note. <sup>1</sup>*n* = 82. <sup>2</sup>*n* = 34.

215 **Between-subjects effects of gender and interactions**

216 Regarding the between-subjects effects, the mixed ANOVA showed that no significant main effect of  
 217 gender ( $F(1,114) = 3.046, p = .084, \eta_p^2 = .026$ ) on perceived work-life balance. While female police  
 218 officers' mean rating increased by six points, their male colleagues' mean rating increased by almost  
 219 ten points from T0 to T2 (see Table 2), the difference was not significant and both groups showed the  
 220 same pattern. Therefore, no significant interaction between time and gender ( $F(1,114) = .279, p = .598,$   
 221  $\eta_p^2 = .002$ ) was found. Figure 2 illustrates that both, males and females showed a similarly sized  
 222 increase for work-life balance across time. These findings support our hypotheses H<sub>1b-c</sub>.

223 Likewise, no significant difference was found between male and female police officers with regard to  
 224 their job satisfaction ( $F(1,114) = .035, p = .851, \eta_p^2 = .000$ ), supporting hypothesis H<sub>2b</sub>. Female and male  
 225 participants' mean job satisfaction increased comparably from T0 to T2 (see Table 2). However, women  
 226 reported marginally higher values at T2 (+.142 points compared to their male colleagues). Therefore,  
 227 the profile plot in Figure 3 depicts slightly crossing lines. Nevertheless, in support of hypothesis H<sub>2c</sub>, no

## POLICE OFFICERS' WORK-LIFE BALANCE

228 significant interaction between time and gender ( $F(1,114) = .095, p = .758, \eta_p^2 = .001$ ) was found for  
229 job satisfaction either.

230 In line with hypothesis H<sub>3b</sub>, we found no significant differences in quality of life means between males  
231 and females ( $F(1,114) = .956, p = .330, \eta_p^2 = .008$ ). Female police officers rated their quality of life higher  
232 than their male colleagues at both time points but both means increased at the same rate (see Table  
233 2). Therefore, no interaction between time and gender was found ( $F(1,114) = .001, p = .977, \eta_p^2 = .000$ ),  
234 as assumed in hypothesis H<sub>3c</sub> and depicted in Figure 4.

235 ---- insert Figures 2-4 here ----

236 Sensitivity analyses with data from the follow up-survey (T2,  $n = 893$  for work-life balance,  $n = 881$  for  
237 job satisfaction and  $n = 907$  for quality of life) indicated that when controlling for the length of time  
238 police officers had worked according to the new shift schedule, between-subject differences did not  
239 change and remained insignificant regardless of whether the exposure duration was added to the  
240 model or not.

## 241 DISCUSSION

242 In the present study, we analysed within- and between-subject differences of three work-related  
243 mental health outcomes among police officers of a German metropolitan police department at two  
244 time points. The baseline data were compared to the survey results five and a half years later, after  
245 implementing a new shift schedule which was supposed to improve mental and physical health of the  
246 police officers. Our findings provide support for most of our hypotheses: work-life balance and job  
247 satisfaction scores significantly increased between the baseline survey and the follow-up. Quality of  
248 life increased as well, but not to a statistically significant extent. At both time points, female police  
249 officers reported higher levels of work-life balance and quality of life, whereas male participants rated  
250 their job satisfaction higher at the baseline. However, no significant differences were found between  
251 male and female police officers regarding their work-life balance, job satisfaction and quality of life.  
252 Notably, the greatest increase over the five and a half years could be observed in the work-life balance  
253 of police officers, followed by job satisfaction and quality of life.

254 Consistent with previous findings, restricted work-life balance due to the shift schedule affected male  
255 and female police officers equally<sup>24-26</sup>. Sociodemographic characteristics revealed that most of the  
256 participants had children and lived in a permanent relationship, whereas only very few participants  
257 were single parents. This may indicate that parents shared their care for children or other relatives and  
258 that traditional gender roles are being undone<sup>24</sup>. However, work-life balance does not only include  
259 balancing work and family matters but also social life and leisure activities. Our results are further

## POLICE OFFICERS' WORK-LIFE BALANCE

260 supported by findings of a another German metropolitan police force that evaluated similar shift  
261 schedules which served as a blueprint for the one we evaluated<sup>35 36</sup>. Accordingly, shift schedules with  
262 more flexible working time arrangements reduced the impact of work-life balance as a potential  
263 stressor and that work-life balance was negatively related to police officers' perceived strain<sup>35</sup>.

264 At both time points, job satisfaction means exceeded those reported by the international and German  
265 general working population<sup>40 43</sup>, indicating a high job satisfaction among our participants overall. In line  
266 with our results, recent findings suggest that changing the shift schedule could have a positive  
267 influence on police officers' job satisfaction<sup>44</sup>. In partial contradiction with our findings, male police  
268 officers reported lower job satisfaction compared to female colleagues in a Greek sample, while female  
269 police officers reported lower values of health-related quality of life compared to their male  
270 colleagues<sup>31</sup>. However, the slightly greater increase of job satisfaction ratings among female  
271 participants in our sample could indicate a gradually closing gender gap with the new shift schedule in  
272 this regard. Yet the results need to be interpreted very cautiously and need to be further evaluated in  
273 the long-term, as the differences were small and not significant.

274 Compared to norm values, quality of life was rated lower in our sample at both time points<sup>41</sup>. A cross-  
275 sectional study among criminal police officers also revealed lower health-related quality of life scores  
276 compared to results from general populations<sup>33</sup>. Nevertheless, it becomes apparent that the quality of  
277 life marginally increased after implementing the new shift schedule, although to a non-significant and  
278 lesser extent than work-life balance and job satisfaction. Further analyses indicated that the working  
279 conditions of the new shift schedule, especially the increased number of 12-hour shifts, did not have  
280 a detrimental impact on the police officers' quality of life<sup>37</sup>. Why the scores for work-life balance and  
281 job satisfaction but not for quality of life between males and females seem to align over time thus  
282 remains unclear. As research on police officers' quality of life has been unfolding recently, future  
283 research will hopefully provide more insights on such differences and further associations.

## 284 Limitations

285 Based on longitudinal data, we were able to examine changes in health-related outcomes among shift-  
286 working police officers before and after implementing a new shift schedule and thus contributed to a  
287 deeper understanding of these outcomes associated with working conditions in shift schedules.  
288 However, some limitations need to be discussed. Although we were able to gather and analyse data  
289 over three different time points, we could only evaluate the baseline and follow-up data in a  
290 longitudinal design. Despite high response rates, lack of given consent to evaluate the data,  
291 retirements and new recruits led to an insufficient sample size after matching participants across all  
292 three time points. Since the piloting was carried out as a successive rollout, not all of the PS surveyed  
293 had introduced the new shift schedule or had sufficient experience with the new shift schedule after

## POLICE OFFICERS' WORK-LIFE BALANCE

one year (T1). We therefore dropped the data of the second evaluation for longitudinal analyses to present longer-term rather than short-term effects. Information on short-term changes one year after the baseline (i.e. piloting of the new shift schedule) are therefore not included in the present analyses. Due to the small sample size, we did not include the exposure duration of the new shift schedule as a covariate into the primary analysis. However, sensitivity analyses conducted on the larger data set of the cross-sectional data from the follow-up survey (T2) showed that the effects did not change when the covariate was added to the model. Although we were able to analyse a larger sample size by considering the baseline and follow-up only, the matched sample differs from the population of shift-working police officers at T2 in age and gender and is therefore not representative of the current metropolitan police force which is now younger and includes more female police officers<sup>37</sup>, again due to retirements and new recruitments. The results from this sample might also not necessarily valid for other police forces. Moreover, the analysed data stem from self-reports of the participants and are thus susceptible to bias such as socially desirable answers. Motivational efforts may also have had an effect on the participants' responses, as the results of the evaluation served as a decision-making basis on the continuation of the piloted shift schedule. Furthermore, selection effects such as the healthy worker effect may influence the results. Answers from colleagues who were under a lot of strain, ill or not able to work, who retired early or changed their profession may have not been reflected in the results which may therefore appear more positive than they would be based on the whole relevant police work force. Lastly, merely effects up to five and a half years after implementing the new shift schedule became evident in this study. Longer-term effects will have to be further evaluated in the future in order to be able to assess the new shift schedule in this respect.

### Implications for research and practice

Our results provide evidence that changing a shift schedule according to occupational health recommendations improved police officers work-life balance and job satisfaction. Nevertheless, it must be taken into account that according to German labour legislation the implementation of 12-hour duties, which is implemented based on European law, requires special permissions and should be strictly limited to the minimum necessary to cover the service. Working in shifts or at nonstandard hours interferes with leisure time and can thus restrict social life or even parenting functioning resources<sup>14 45</sup>. The costs and benefits of longer duties and consecutive off-duty periods therefore must be weighed carefully. For a better work-life balance and prevention of detrimental health effects, shifts should be variable and predictable<sup>14 35 46</sup>. This was implemented with the new shift schedule and also acknowledged in additional free text answers participants gave in the follow-up survey. In order to better balance police work with care work that occurs in specific stages of life, such as raising children or caring for relatives, more flexible working time models could be supportive. In relation to the entire



## POLICE OFFICERS' WORK-LIFE BALANCE

1  
2  
3 328 working life, working time could be reduced in such phases, therefore enabling a better balance of  
4  
5 329 private and professional life<sup>35</sup>. After successfully implementing the new shift schedule, further health-  
6  
7 330 promoting measures should be offered to police officers. Research findings suggest that educational-  
8  
9 331 based family-friendly programmes should be established in PS<sup>47</sup>. Moreover, several health promotion  
10  
11 332 programmes for police forces have been evaluated recently<sup>48-50</sup>. In this vein, mindfulness-based health  
12  
13 333 promotion was recently shown to be feasible and efficacious to improve quality of life among Brazilian  
14  
15 334 officers<sup>48</sup>. It is also recommended to identify police officers' risk factors for mental health early to be  
16  
17 335 able to prevent and promote their quality of life<sup>51</sup>. Continuous participation of police officers should  
18  
19 336 be maintained to shape and continuously adapt the change process of implementing the new shift  
20  
21 337 schedule<sup>35</sup>. Regularly conducted risk assessments can provide a basis for this and identify such  
22  
23 338 stressors to counteract them preventively.

## 339 CONCLUSION

24  
25  
26 340 The results of this longitudinal study demonstrated small positive changes five and a half years after  
27  
28 341 adapting a German metropolitan police force's alternating shift schedule. The new shift schedule  
29  
30 342 providing more 12-hour shifts as well as more off-duty days enabled police officers to better balance  
31  
32 343 private and work-related demands regardless of their gender. The altered working conditions were  
33  
34 344 also reflected in higher job satisfaction, whereas the increase in quality of life was not significant.  
35  
36 345 Despite the benefits of more predictable scheduling and free time in the new shift schedule, more  
37  
38 346 frequent 12-hour shifts during the day and night may entail adverse health effects in the long run.  
39  
40 347 Therefore, larger cohort studies and evaluations over a longer period of time with several  
41  
42 348 measurement points are recommended to verify the effects and continuously monitor its  
43  
44 349 consequences for police officers.

## 44 STATEMENTS

45  
46 350 **Dedication:** We respectfully dedicate this paper to the memory of our colleague Cordula Bittner (1968-  
47  
48 351 2019), who led the first part of the evaluation (2015-2016) ensuring a fruitful dialogue between  
49  
50 352 researchers and police, which laid the foundation for the further evaluation 2021.

51  
52 353 **Acknowledgements:** We would like to thank all police officers who supported the evaluation process  
53  
54 354 and those who participated in the surveys. Furthermore, we would like to acknowledge Niklas Kiepe,  
55  
56 355 Lea Rischke and Joelle-Cathrin Flöther for their support in digitising the data.

57  
58 356 **Authors' contributions:** ER drafted the manuscript and conducted data analyses. ER, MVG and RH  
59  
60 357 prepared the data for analyses. ER, MVG, RH, AMP, CT, VH and SM participated in designing the study.

## POLICE OFFICERS' WORK-LIFE BALANCE

359 MVG, RH, AMP, CT, VH and SM supervised the study and data analyses. MVG administered the project.  
 360 MVG, RH, AMP, CT, VH and SM contributed in the drafting of the manuscript. All authors read and  
 361 approved the final manuscript.

362 **Ethics approval:** The study was approved by the Ethics Review Committee of the Hamburg Medical  
 363 Association, Germany (PV4999 / WF-009/20).

364 **Funding:** This work was supported by Polizei Hamburg (grant number: N/A).

365 **Competing interests:** All authors declare no competing interests.

366 **Data sharing statement:** The data cannot be made available due to the contractual provision with the  
 367 cooperation partner.

## REFERENCES

- 368 369 1. Gu F, Han J, Laden F, et al. Total and cause-specific mortality of U.S. nurses working rotating night  
 370 shifts. *Am J Prev Med* 2015;48:241-52. doi: 10.1016/j.amepre.2014.10.018
- 371 372 2. Vetter C, Devore EE, Wegrzyn LR, et al. Association Between Rotating Night Shift Work and Risk of  
 373 Coronary Heart Disease Among Women. *JAMA* 2016;315(16):1726-34. doi:  
 374 10.1001/jama.2016.4454
- 375 376 3. Vyas MV, Garg AX, Iansai AV, et al. Shift work and vascular events: systematic review and meta-  
 377 analysis. *BMJ* 2012;345:e4800. doi: 10.1136/bmj.e4800
- 378 379 4. Ijaz S, Verbeek J, Seidler A, et al. Night-shift work and breast cancer--a systematic review and meta-  
 380 analysis. *Scand J Work Environ Health* 2013;39:431-47. doi: 10.5271/sjweh.3371
- 381 382 5. Jia Y, Lu Y, Wu K, et al. Does night work increase the risk of breast cancer? A systematic review and  
 383 meta-analysis of epidemiological studies. *Cancer Epidemiol* 2013;37:197-206. doi:  
 384 10.1016/j.canep.2013.01.005
- 385 386 6. Rao D, Yu H, Bai Y, et al. Does night-shift work increase the risk of prostate cancer? a systematic  
 387 review and meta-analysis. *Oncotargets Ther* 2015;8:2817-26. doi: 10.2147/OTT.S89769
- 388 389 7. Wang X, Ji A, Zhu Y, et al. A meta-analysis including dose-response relationship between night shift  
 390 work and the risk of colorectal cancer. *Oncotarget* 2015;6:25046-60. doi:  
 391 10.18632/oncotarget.4502
- 392 393 8. Sallinen M, Kecklund G. Shift work, sleep, and sleepiness – differences between shift schedules and  
 394 systems. *Scand J Work Environ Health* 2010;36:121-33. doi: 10.5271/sjweh.2900
- 395 396 9. Brown JP, Martin D, Nagaria Z, et al. Mental Health Consequences of Shift Work: An Updated Review.  
 397 *Curr Psychiatry Rep* 2020;22(2):7. doi: 10.1007/s11920-020-1131-z
- 398 399 10. Folkard S. Effects on performance efficiency. In: Colquhoun WP, Costa G, Folkard S, et al., eds.  
 400 *Shiftwork Problems and Solutions*. Frankfurt am Main: Peter Lang 1996:65-87.
- 401 402 11. Monk TH, Folkard S, Wedderburn AI. Maintaining safety and high performance on shiftwork. *Appl*  
 403 *Ergon* 1996;27:17-23. doi: 10.1016/0003-6870(95)00048-8
- 404 405 12. Wüthrich P. Studie über die gesundheitlichen, sozialen und psychischen Auswirkungen der Nacht-  
 406 und Schichtarbeit [Study on the health, social and psychological effects of night and shift work].  
 407 Bern: Schweizerischer Gewerkschaftsbund, 2003.
- 408 409 13. Deutsche Gesellschaft für Arbeitsmedizin und Umweltmedizin. Nacht- und Schichtarbeit. S1-  
 410 Leitlinie der Deutschen Gesellschaft für Arbeitsmedizin und Umweltmedizin [Night work and  
 411 shift work. S1 Guideline of the German Society for Occupational and Environmental Medicine],  
 412 2006.

## POLICE OFFICERS' WORK-LIFE BALANCE

- 1  
2  
3 401 14. Wöhrmann AM, Müller G, Ewert K. Shift Work and Work-Family Conflict: A Systematic Review.  
4 402 *Sozialpolitik* 2020;3(2):1-26. doi: 10.18753/2297-8224-165
- 5 403 15. Islam T, Khan MM, Ahmed I, et al. Work-family conflict and job dissatisfaction among police officers:  
6 404 mediation of threat to family role and moderation of role segmentation enhancement. *Policing*  
7 405 2020;43(2):403-15. doi: 10.1108/PIJPSM-06-2019-0087
- 8 406 16. Rath N, Barath M. Work - family conflict and job and family satisfaction. *Equal Divers Incl*  
9 407 2013;32(4):438-54. doi: 10.1108/EDI-10-2012-0092
- 10 408 17. Frank J, Lambert EG, Qureshi H, et al. Problems spilling over: work-family conflict's and other  
11 409 stressor variables' relationships with job involvement and satisfaction among police officers. *J*  
12 410 *Polic Intell Count Terror* 2021:1-24. doi: 10.1080/18335330.2021.1946711
- 13 411 18. Gary Howard W, Howard Donofrio H, Boles JS. Inter - domain work - family, family - work conflict  
14 412 and police work satisfaction. *Policing* 2004;27(3):380-95. doi: 10.1108/13639510410553121
- 15 413 19. Griffin JD, Sun IY. Do Work-Family Conflict and Resiliency Mediate Police Stress and Burnout: a  
16 414 Study of State Police Officers. *AJCI* 2018;43(2):354-70. doi: 10.1007/s12103-017-9401-y
- 17 415 20. Lambert EG, Qureshi H, Keena LD, et al. Exploring the link between work-family conflict and job  
18 416 burnout among Indian police officers. *Police J* 2019;92(1):35-55. doi:  
19 417 10.1177/0032258x18761285
- 20 418 21. Bazana S, Dodd N. Conscientiousness, Work Family Conflict and Stress amongst Police Officers in  
21 419 Alice, South Africa. *J Psychol* 2013;4(1):1-8. doi: 10.1080/09764224.2013.11885487
- 22 420 22. Mikkelsen A, Burke RJ. Work-family concerns of Norwegian police officers: Antecedents and  
23 421 consequences. *Int J Stress Manag* 2004;11(4):429-44. doi: 10.1037/1072-5245.11.4.429
- 24 422 23. Kurtz DL. Roll call and the second shift: the influences of gender and family on police stress. *Police*  
25 423 *Pract Res* 2012;13(1):71-86. doi: 10.1080/15614263.2011.596714
- 26 424 24. Duxbury L, Bardoel A, Halinski M. 'Bringing the Badge home': exploring the relationship between  
27 425 role overload, work-family conflict, and stress in police officers. *Policing Soc* 2021;31(8):997-  
28 426 1016. doi: 10.1080/10439463.2020.1822837
- 29 427 25. He N, Zhao J, Archbold CA. Gender and police stress. *Policing* 2002;25(4):687-708. doi:  
30 428 10.1108/13639510210450631
- 31 429 26. Janzen BL, Muhajarine N, Kelly IW. Work-Family Conflict, and Psychological Distress in Men and  
32 430 Women among Canadian Police Officers. *Psychol Rep* 2007;100(2):556-62. doi:  
33 431 10.2466/pr0.100.2.556-562
- 34 432 27. Dantzer M, Kubin B. Job satisfaction: The gender perspective among police officers. *AJCI*  
35 433 1998;23(1):19-31.
- 36 434 28. Miller HA, Mire S, Kim B. Predictors of job satisfaction among police officers: Does personality  
37 435 matter? *J Crim Justice* 2009;37(5):419-26. doi: 10.1016/j.jcrimjus.2009.07.001
- 38 436 29. Johnson RR. Police Officer Job Satisfaction: A Multidimensional Analysis. *Police Q* 2012;15(2):157-  
39 437 76. doi: 10.1177/1098611112442809
- 40 438 30. Lu L, Liu L, Sui G, et al. The Associations of Job Stress and Organizational Identification with Job  
41 439 Satisfaction among Chinese Police Officers: The Mediating Role of Psychological Capital. *Int J*  
42 440 *Environ Res Public Health* 2015;12(12):15088-99.
- 43 441 31. Alexopoulos EC, Palatsidi V, Tigani X, et al. Exploring Stress Levels, Job Satisfaction, and Quality of  
44 442 Life in a Sample of Police Officers in Greece. *Saf Health at Work* 2014;5(4):210-15. doi:  
45 443 10.1016/j.shaw.2014.07.004
- 46 444 32. Arroyo TR, Borges MA, Lourenção LG. Health and quality of life of military police officers. *Brazilian*  
47 445 *J Health Promot* 2019;32(7738):1-9. doi: 10.5020/18061230.2019.7738
- 48 446 33. Wu X, Liu Q, Li Q, et al. Health-Related Quality of Life and Its Determinants among Criminal Police  
49 447 Officers. *Int J Environ Res Public Health* 2019;16(8):1398. doi: 10.3390/ijerph16081398
- 50 448 34. Morales-Manrique CC, Valderrama-Zurián JC. Quality of life in police officers: What is known and  
51 449 proposals. *Pap Psicol* 2012;33(1):60-67.
- 52 450 35. Härtwig C, Sporbert A. Evaluation der Einführung verschiedener Arbeitszeitmodelle. Befunde einer  
53 451 quasi-experimentellen Längsschnittstudie bei der Polizei [Evaluation of the introduction of

## POLICE OFFICERS' WORK-LIFE BALANCE

- 1  
2  
3 452 different working time models: Findings of a quasiexperimental longitudinal study at the  
4 453 police]. *Z Arbeitswiss* 2013;67(4):243-51. doi: 10.1007/BF03374413
- 5 454 36. Hoff E-H, Härtwig C, Sporbert A. Wissenschaftliche Begleitung und Evaluation zur Einführung neuer  
6 455 Arbeitszeitmodelle bei der Polizei Berlin. Abschlussbericht 31. Juli 2012 [Scientific monitoring  
7 456 and evaluation of the introduction of new working time models at the Berlin Police. Final  
8 457 report 31 July 2012] Berlin: Freie Universität Berlin; 2012 [Available from:  
9 458 <https://www.parlament-berlin.de/ad0s/17/InnSichO/protokoll/iso17-035-ip-Anlage.pdf>  
10 458 accessed 8 February 2022].
- 11 459
- 12 460 37. Velasco Garrido M, Herold R, Rohwer E, et al. Evolution of work ability, quality of life and self-rated  
13 461 health in a police department after changing shift schedule. *in preparation* 2022
- 14 462 38. Herold R, Velasco Garrido M, Rohwer E, et al. *in preparation* 2022
- 15 463 39. Nübling M, Stöbel U, Hasselhorn HM, et al. Methoden zur Erfassung psychischer Belastung –  
16 464 Erprobung eines Messinstrumentes (COPSOQ) [Methods for assessing mental stress - testing  
17 465 a measurement instrument (COPSOQ)]. Dortmund/Berlin/Dresden: Bundesanstalt für  
18 466 Arbeitsschutz und Arbeitsmedizin, 2005.
- 19 467 40. Lincke H-J, Vomstein M, Lindner A, et al. COPSOQ III in Germany: validation of a standard  
20 468 instrument to measure psychosocial factors at work. *J Occup Med Toxicol* 2021;16(1):50. doi:  
21 469 10.1186/s12995-021-00331-1
- 22 470 41. Angermeyer M, Kilian R, Matschinger H. WHOQOL-100 und WHOQOL-BREF. Handbuch für die  
23 471 deutschsprachigen Versionen der WHO Instrumente zur Erfassung von Lebensqualität  
24 472 [WHOQOL-100 and WHOQOL-BREF. Manual for the German-language versions of the WHO  
25 473 quality of life instruments]. Göttingen: Hogrefe 2000.
- 26 474 42. Cohen J. *Statistical Power Analysis for the Behavioral Sciences*. 2 ed. Hillsdale, NJ: Lawrence  
27 475 Erlbaum Associates 1988.
- 28 476 43. Burr H, Berthelsen H, Moncada S, et al. The Third Version of the Copenhagen Psychosocial  
29 477 Questionnaire. *Saf Health Work* 2019;10(4):482-503. doi: 10.1016/j.shaw.2019.10.002
- 30 478 44. Paoline EA, Gau JM. An Empirical Assessment of the Sources of Police Job Satisfaction. *Police Q*  
31 479 2020;23(1):55-81. doi: 10.1177/1098611119875117
- 32 480 45. Zhao Y, Cooklin A, Butterworth P, et al. How does working nonstandard hours impact psychological  
33 481 resources important for parental functioning? Evidence from an Australian longitudinal cohort  
34 482 study. *SSM Popul Health* 2021;16:100931. doi: 10.1016/j.ssmph.2021.100931
- 35 483 46. Scholarios D, Hesselgreaves H, Pratt R. Unpredictable working time, well-being and health in the  
36 484 police service. *Int J Hum Resour Manag* 2017;28(16):2275-98. doi:  
37 485 10.1080/09585192.2017.1314314
- 38 486 47. Youngcourt SS, Huffman AH. Family-friendly policies in the police: Implications for work-family  
39 487 conflict. *Appl Psychol Crim Justice* 2005;1(2):138-62.
- 40 488 48. Trombka M, Demarzo M, Campos D, et al. Mindfulness Training Improves Quality of Life and  
41 489 Reduces Depression and Anxiety Symptoms Among Police Officers: Results From the POLICE  
42 490 Study—A Multicenter Randomized Controlled Trial. *Front Psychiatry* 2021;12 doi:  
43 491 10.3389/fpsy.2021.624876
- 44 492 49. Liakopoulou D, Tigani X, Varvogli L, et al. Stress management and health promotion intervention  
45 493 program for police forces. *Int J Police Sci Manag* 2020;22(2):148-58. doi:  
46 494 10.1177/1461355719898202
- 47 495 50. Márquez MA, Galiana L, Oliver A, et al. The impact of a mindfulness-based intervention on the  
48 496 quality of life of Spanish national police officers. *Health Soc Care Community* 2021;29(5):1491-  
49 497 501. doi: 10.1111/hsc.13209
- 50 498 51. Galanis P, Fragkou D, Katsoulas TA. Risk factors for stress among police officers: A systematic  
51 499 literature review. *Work* 2021;68:1255-72. doi: 10.3233/WOR-213455
- 52 500 52. Paridon H, Ernst S, Harth V, et al. DGUV Report 1/2012: Schichtarbeit. Rechtslage, gesundheitliche  
53 501 Risiken und Präventionsmöglichkeiten [DGUV Report 1/2012: Shift work. Legal situation,  
54 502 health risks and prevention options] Berlin: Deutsche Gesetzliche Unfallversicherung (DGUV);  
55  
56  
57  
58  
59  
60

## POLICE OFFICERS' WORK-LIFE BALANCE

503 2012 [Available from: <https://publikationen.dguv.de/widgets/pdf/download/article/2554>  
504 accessed 8 February 2022].

505

## FIGURE LEGENDS

507 Figure 1: Participant flow chart across measurement points. Percentages in parentheses indicate  
508 response rates.

509 Figure 2: Profile plot of time and gender interaction for work-life balance ( $N = 116$ ).

510 Figure 3: Profile plot of time and gender interaction for job satisfaction ( $N = 116$ ).

511 Figure 4: Profile plot of time and gender interaction for quality of life ( $N = 116$ ).

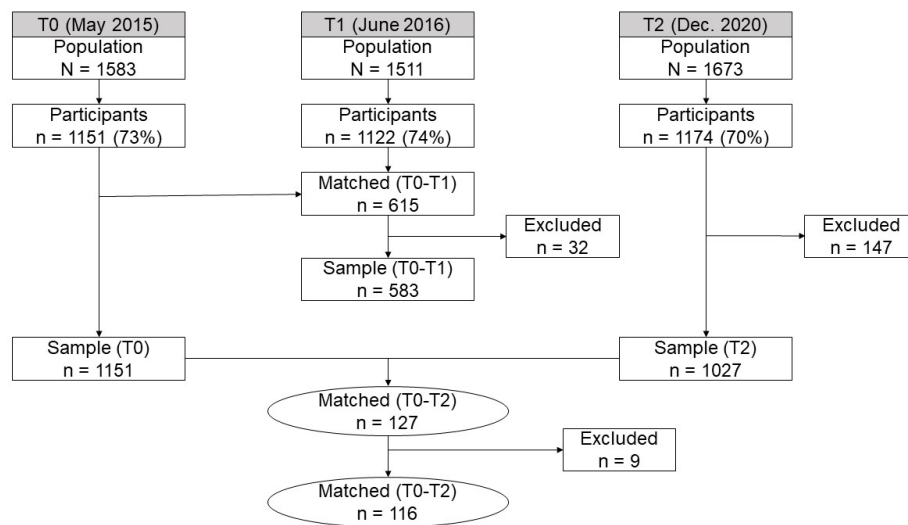

Figure 1: Participant flow chart across measurement points. Percentages in parentheses indicate response rates.

338x190mm (96 x 96 DPI)

1  
2  
3  
4  
5  
6  
7  
8  
9  
10  
11  
12  
13  
14  
15  
16  
17  
18  
19  
20  
21  
22  
23  
24  
25  
26  
27  
28  
29  
30  
31  
32  
33  
34  
35  
36  
37  
38  
39  
40  
41  
42  
43  
44  
45  
46  
47  
48  
49  
50  
51  
52  
53  
54  
55  
56  
57  
58  
59  
60

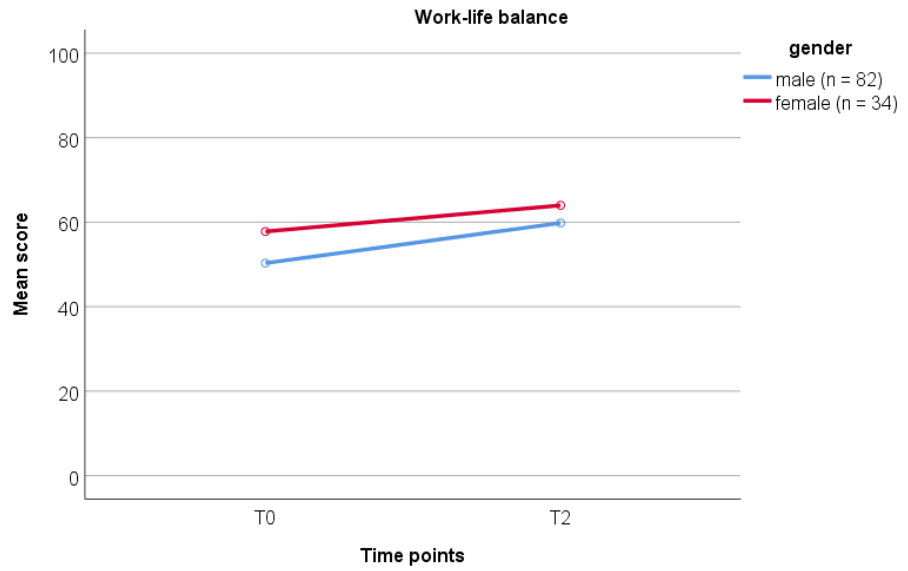

Figure 2. Profile plot of time and gender interaction for work-life balance (N = 116).

568x334mm (38 x 38 DPI)

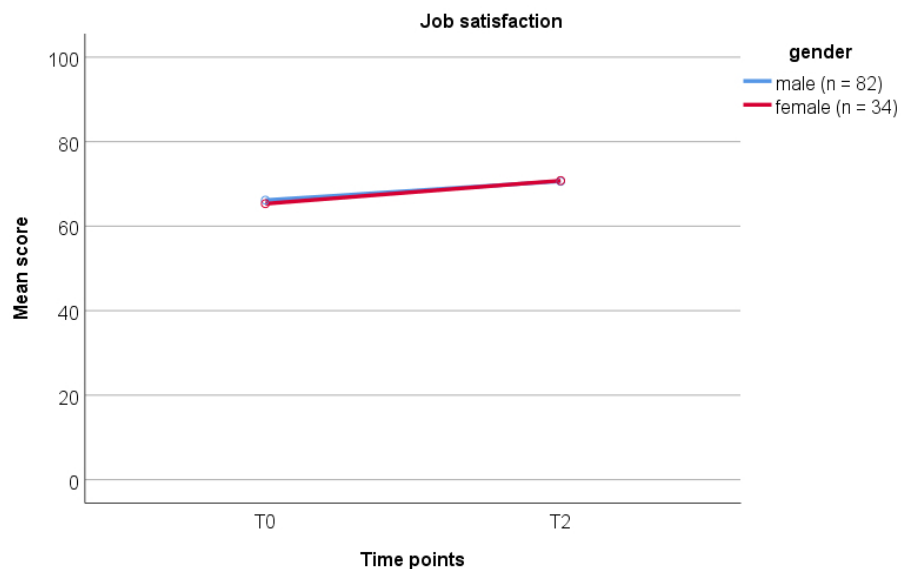

Figure 3. Profile plot of time and gender interaction for job satisfaction (N = 116).

568x334mm (38 x 38 DPI)



1  
2  
3  
4  
5  
6  
7  
8  
9  
10  
11  
12  
13  
14  
15  
16  
17  
18  
19  
20  
21  
22  
23  
24  
25  
26  
27  
28  
29  
30  
31  
32  
33  
34  
35  
36  
37  
38  
39  
40  
41  
42  
43  
44  
45  
46  
47  
48  
49  
50  
51  
52  
53  
54  
55  
56  
57  
58  
59  
60

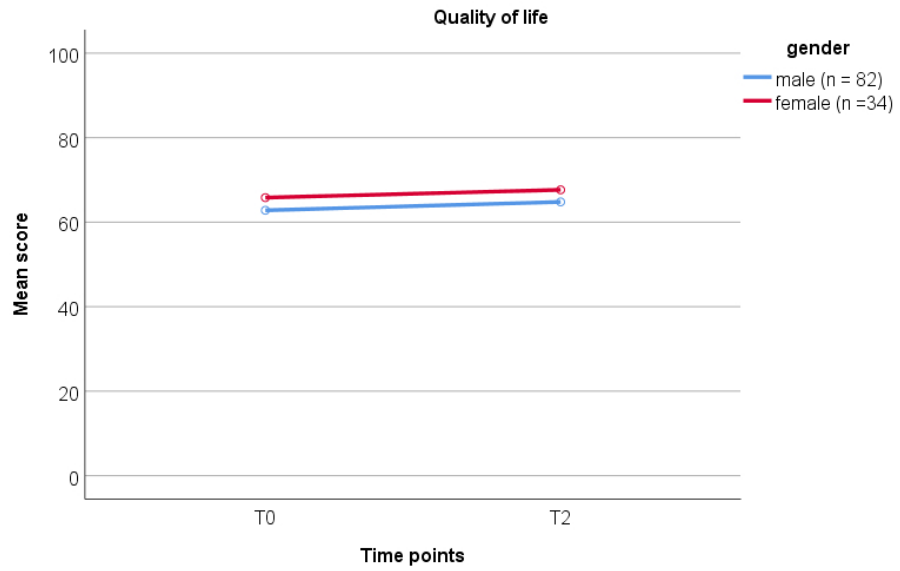

Figure 4. Profile plot of time and gender interaction for quality of life (N = 116).

568x334mm (38 x 38 DPI)

## POLICE OFFICERS' WORK-LIFE BALANCE

## 1 SUPPLEMENTARY MATERIALS

2 **Table S1. Comparison of previous and new shift schedule over an eight-week period.**

| Recommendations                                                 | Previous shift schedule                         | New shift schedule                              |
|-----------------------------------------------------------------|-------------------------------------------------|-------------------------------------------------|
| Number of consecutive night shifts (< 3)                        | 1 night shift                                   | 2 night shifts                                  |
| Rest period as long as possible after night shift phase (> 24h) | Yes                                             | Yes                                             |
| Blocked weekend breaks better than single days off              | no free weekend                                 | 1 free weekend                                  |
| Days off per rotation                                           | 2 days off (without "sleep-in days")            | 14 days off (without "sleep-in days")           |
| Forward rotation better than backward rotation                  | Forward rotation                                | Forward rotation                                |
| Start early shift not before 6:00 a.m.                          | 5:30 a.m.                                       | 6:00 a.m.                                       |
| End night shift as early as possible                            | 5:45 a.m.                                       | 6:00 a.m.                                       |
| Flexibility for the individual worker                           | No                                              | No                                              |
| Avoid excessive daily working hours                             | 4 x 12-hour shifts (Sundays only)               | 14 x 12-hour shifts                             |
| Further characteristics of shift schedules                      | including 40 hours for free shifts              | including 39 hours for free shifts              |
|                                                                 | 360 hours including duty instructions and sport | 359 hours including duty instructions and sport |
|                                                                 | 40 duties                                       | 35 duties                                       |

3 *Note.* Recommendations based on German Social Accident Insurance (Paridon et al., 2012, p. 136)<sup>52</sup>.

4 Light grey indicates conformity, dark grey indicates non-conformity with recommendation.

POLICE OFFICERS' WORK-LIFE BALANCE

5 **Table S2. Means and standard deviations for work-life balance, job satisfaction and quality of life at all three points of measurement.**

| Variables         | T0 (N = 1151 <sup>1</sup> ) |         |        |        | T1 (N = 1122 <sup>2</sup> ) |         |        |        | T2 (N = 1027 <sup>3</sup> ) |         |        |        |
|-------------------|-----------------------------|---------|--------|--------|-----------------------------|---------|--------|--------|-----------------------------|---------|--------|--------|
|                   | Min                         | Max     | M      | SD     | Min                         | Max     | M      | SD     | Min                         | Max     | M      | SD     |
| Work-life balance | .000                        | 100.000 | 48.880 | 22.023 | .000                        | 100.000 | 52.805 | 23.967 | .000                        | 100.000 | 61.257 | 19.884 |
| Job satisfaction  | 4.714                       | 100.000 | 60.629 | 13.009 | 4.714                       | 100.000 | 62.360 | 11.864 | .000                        | 100.000 | 69.439 | 12.372 |
| Quality of life   | .000                        | 100.000 | 59.846 | 19.943 | .000                        | 100.000 | 64.436 | 19.451 | .000                        | 100.000 | 67.929 | 18.185 |

6 Note. <sup>1</sup>T0: Work-life balance *n* = 1121, job satisfaction *n* = 1108, quality of life *n* = 1149. <sup>2</sup>T1: Work-life balance *n* = 1091, job satisfaction *n* = 1075, quality of life  
7 *n* = 1117. <sup>3</sup>T2: Work-life balance *n* = 1002, job satisfaction *n* = 989, quality of life *n* = 1020.

peer review only

POLICE OFFICERS' WORK-LIFE BALANCE

1  
2  
3  
4  
5  
6  
7  
8  
9  
10  
11  
12  
13  
14  
15  
16  
17  
18  
19  
20  
21  
22  
23  
24  
25  
26  
27  
28  
29  
30  
31  
32  
33  
34  
35  
36  
37  
38  
39  
40  
41  
42  
43  
44  
45  
46  
47  
48  
49  
50  
51  
52  
53  
54  
55  
56  
57  
58  
59  
60

8

For peer review only

**STROBE 2007 (v4) Statement—Checklist of items that should be included in reports of *cohort studies***

| Section/Topic                | Item # | Recommendation                                                                                                                                                                       | Reported on page # |
|------------------------------|--------|--------------------------------------------------------------------------------------------------------------------------------------------------------------------------------------|--------------------|
| <b>Title and abstract</b>    | 1      | (a) Indicate the study's design with a commonly used term in the title or the abstract                                                                                               | 1                  |
|                              |        | (b) Provide in the abstract an informative and balanced summary of what was done and what was found                                                                                  | 2                  |
| <b>Introduction</b>          |        |                                                                                                                                                                                      |                    |
| Background/rationale         | 2      | Explain the scientific background and rationale for the investigation being reported                                                                                                 | 3-4                |
| Objectives                   | 3      | State specific objectives, including any prespecified hypotheses                                                                                                                     | 4                  |
| <b>Methods</b>               |        |                                                                                                                                                                                      |                    |
| Study design                 | 4      | Present key elements of study design early in the paper                                                                                                                              | 5                  |
| Setting                      | 5      | Describe the setting, locations, and relevant dates, including periods of recruitment, exposure, follow-up, and data collection                                                      | 5                  |
| Participants                 | 6      | (a) Give the eligibility criteria, and the sources and methods of selection of participants. Describe methods of follow-up                                                           | 5                  |
|                              |        | (b) For matched studies, give matching criteria and number of exposed and unexposed                                                                                                  | 5-6                |
| Variables                    | 7      | Clearly define all outcomes, exposures, predictors, potential confounders, and effect modifiers. Give diagnostic criteria, if applicable                                             | 5-6                |
| Data sources/<br>measurement | 8*     | For each variable of interest, give sources of data and details of methods of assessment (measurement). Describe comparability of assessment methods if there is more than one group | 5-6                |
| Bias                         | 9      | Describe any efforts to address potential sources of bias                                                                                                                            | 9                  |
| Study size                   | 10     | Explain how the study size was arrived at                                                                                                                                            | 5-6                |
| Quantitative variables       | 11     | Explain how quantitative variables were handled in the analyses. If applicable, describe which groupings were chosen and why                                                         | 6                  |
| Statistical methods          | 12     | (a) Describe all statistical methods, including those used to control for confounding                                                                                                | 6                  |
|                              |        | (b) Describe any methods used to examine subgroups and interactions                                                                                                                  | 6                  |
|                              |        | (c) Explain how missing data were addressed                                                                                                                                          | 6                  |
|                              |        | (d) If applicable, explain how loss to follow-up was addressed                                                                                                                       | 5                  |
|                              |        | (e) Describe any sensitivity analyses                                                                                                                                                | 6                  |
| <b>Results</b>               |        |                                                                                                                                                                                      | 6                  |

|                          |     |                                                                                                                                                                                                              |                |
|--------------------------|-----|--------------------------------------------------------------------------------------------------------------------------------------------------------------------------------------------------------------|----------------|
| Participants             | 13* | (a) Report numbers of individuals at each stage of study—eg numbers potentially eligible, examined for eligibility, confirmed eligible, included in the study, completing follow-up, and analysed            | 5              |
|                          |     | (b) Give reasons for non-participation at each stage                                                                                                                                                         | 5              |
|                          |     | (c) Consider use of a flow diagram                                                                                                                                                                           | 5              |
| Descriptive data         | 14* | (a) Give characteristics of study participants (eg demographic, clinical, social) and information on exposures and potential confounders                                                                     | 7              |
|                          |     | (b) Indicate number of participants with missing data for each variable of interest                                                                                                                          | 7-8            |
|                          |     | (c) Summarise follow-up time (eg, average and total amount)                                                                                                                                                  | 8              |
| Outcome data             | 15* | Report numbers of outcome events or summary measures over time                                                                                                                                               | 8              |
| Main results             | 16  | (a) Give unadjusted estimates and, if applicable, confounder-adjusted estimates and their precision (eg, 95% confidence interval). Make clear which confounders were adjusted for and why they were included | Not applicable |
|                          |     | (b) Report category boundaries when continuous variables were categorized                                                                                                                                    | Not applicable |
|                          |     | (c) If relevant, consider translating estimates of relative risk into absolute risk for a meaningful time period                                                                                             | Not applicable |
| Other analyses           | 17  | Report other analyses done—eg analyses of subgroups and interactions, and sensitivity analyses                                                                                                               | 9              |
| <b>Discussion</b>        |     |                                                                                                                                                                                                              |                |
| Key results              | 18  | Summarise key results with reference to study objectives                                                                                                                                                     | 10             |
| <b>Limitations</b>       |     |                                                                                                                                                                                                              |                |
| Interpretation           | 20  | Give a cautious overall interpretation of results considering objectives, limitations, multiplicity of analyses, results from similar studies, and other relevant evidence                                   | 10-11          |
| Generalisability         | 21  | Discuss the generalisability (external validity) of the study results                                                                                                                                        | 11             |
| <b>Other information</b> |     |                                                                                                                                                                                                              |                |
| Funding                  | 22  | Give the source of funding and the role of the funders for the present study and, if applicable, for the original study on which the present article is based                                                | 16             |

\*Give information separately for cases and controls in case-control studies and, if applicable, for exposed and unexposed groups in cohort and cross-sectional studies.

**Note:** An Explanation and Elaboration article discusses each checklist item and gives methodological background and published examples of transparent reporting. The STROBE checklist is best used in conjunction with this article (freely available on the Web sites of PLoS Medicine at <http://www.plosmedicine.org/>, Annals of Internal Medicine at <http://www.annals.org/>, and Epidemiology at <http://www.epidem.com/>). Information on the STROBE Initiative is available at [www.strobe-statement.org](http://www.strobe-statement.org).

# BMJ Open

## Police officers' work-life balance, job satisfaction and quality of life – Longitudinal effects after changing the shift schedule

|                                 |                                                                                                                                                                                                                                                                                                                                                                                                                                                                                                                                                                                                                                                                                                                                                                                                                      |
|---------------------------------|----------------------------------------------------------------------------------------------------------------------------------------------------------------------------------------------------------------------------------------------------------------------------------------------------------------------------------------------------------------------------------------------------------------------------------------------------------------------------------------------------------------------------------------------------------------------------------------------------------------------------------------------------------------------------------------------------------------------------------------------------------------------------------------------------------------------|
| Journal:                        | <i>BMJ Open</i>                                                                                                                                                                                                                                                                                                                                                                                                                                                                                                                                                                                                                                                                                                                                                                                                      |
| Manuscript ID                   | bmjopen-2022-063302.R1                                                                                                                                                                                                                                                                                                                                                                                                                                                                                                                                                                                                                                                                                                                                                                                               |
| Article Type:                   | Original research                                                                                                                                                                                                                                                                                                                                                                                                                                                                                                                                                                                                                                                                                                                                                                                                    |
| Date Submitted by the Author:   | 22-Jul-2022                                                                                                                                                                                                                                                                                                                                                                                                                                                                                                                                                                                                                                                                                                                                                                                                          |
| Complete List of Authors:       | Rohwer, Elisabeth; University Medical Center Hamburg-Eppendorf, Institute for Occupational and Maritime Medicine<br>Velasco Garrido, Marcial; Universitätsklinikum Hamburg-Eppendorf, Institute for Occupational and Maritime Health<br>Herold, Robert; University Medical Center Hamburg-Eppendorf, Institute for Occupational and Maritime Medicine<br>Preisser, A; University Medical Centre Hamburg-Eppendorf, Institute for Occupational and Maritime Medicine<br>Terschüren, Claudia; University Medical Center Hamburg-Eppendorf, Institute for Occupational and Maritime Medicine<br>Harth, Volker; Universitätsklinikum Hamburg-Eppendorf, Institute for Occupational and Maritime Health<br>Mache, Stefanie; University Medical Center Hamburg-Eppendorf, Institute for Occupational and Maritime Medicine |
| <b>Primary Subject Heading</b>: | Occupational and environmental medicine                                                                                                                                                                                                                                                                                                                                                                                                                                                                                                                                                                                                                                                                                                                                                                              |
| Secondary Subject Heading:      | Mental health, Occupational and environmental medicine                                                                                                                                                                                                                                                                                                                                                                                                                                                                                                                                                                                                                                                                                                                                                               |
| Keywords:                       | OCCUPATIONAL & INDUSTRIAL MEDICINE, MENTAL HEALTH, EPIDEMIOLOGY                                                                                                                                                                                                                                                                                                                                                                                                                                                                                                                                                                                                                                                                                                                                                      |
|                                 |                                                                                                                                                                                                                                                                                                                                                                                                                                                                                                                                                                                                                                                                                                                                                                                                                      |

SCHOLARONE™  
Manuscripts



I, the Submitting Author has the right to grant and does grant on behalf of all authors of the Work (as defined in the below author licence), an exclusive licence and/or a non-exclusive licence for contributions from authors who are: i) UK Crown employees; ii) where BMJ has agreed a CC-BY licence shall apply, and/or iii) in accordance with the terms applicable for US Federal Government officers or employees acting as part of their official duties; on a worldwide, perpetual, irrevocable, royalty-free basis to BMJ Publishing Group Ltd ("BMJ") its licensees and where the relevant Journal is co-owned by BMJ to the co-owners of the Journal, to publish the Work in this journal and any other BMJ products and to exploit all rights, as set out in our [licence](#).

The Submitting Author accepts and understands that any supply made under these terms is made by BMJ to the Submitting Author unless you are acting as an employee on behalf of your employer or a postgraduate student of an affiliated institution which is paying any applicable article publishing charge ("APC") for Open Access articles. Where the Submitting Author wishes to make the Work available on an Open Access basis (and intends to pay the relevant APC), the terms of reuse of such Open Access shall be governed by a Creative Commons licence – details of these licences and which [Creative Commons](#) licence will apply to this Work are set out in our licence referred to above.

Other than as permitted in any relevant BMJ Author's Self Archiving Policies, I confirm this Work has not been accepted for publication elsewhere, is not being considered for publication elsewhere and does not duplicate material already published. I confirm all authors consent to publication of this Work and authorise the granting of this licence.



POLICE OFFICERS' WORK-LIFE BALANCE

1  
2  
3  
4  
5 1 **POLICE OFFICERS' WORK-LIFE BALANCE, JOB**  
6  
7 2 **SATISFACTION AND QUALITY OF LIFE – LONGITUDINAL**  
8  
9  
10 3 **EFFECTS AFTER CHANGING THE SHIFT SCHEDULE**  
11  
12

13 4 Elisabeth Rohwer<sup>1</sup>, Marcial Velasco Garrido<sup>1</sup>, Robert Herold<sup>1</sup>, Alexandra M. Preisser<sup>1</sup>, Claudia  
14 5 Terschüren<sup>1</sup>, Volker Harth<sup>1</sup>, Stefanie Mache<sup>1</sup>

16 6 <sup>1</sup>Institute for Occupational and Maritime Medicine, University Medical Center Hamburg-Eppendorf,  
17 7 Hamburg, Germany

18 8 Correspondence to Elisabeth Rohwer; [e.rohwer.ext@uke.de](mailto:e.rohwer.ext@uke.de), Seewartenstr. 10, Hs. 1, 20459  
19 9 Hamburg, Germany

20  
21  
22  
23  
24 10  
25  
26  
27  
28  
29  
30  
31  
32  
33  
34  
35  
36  
37  
38  
39  
40  
41  
42  
43  
44  
45  
46  
47  
48  
49  
50  
51  
52  
53  
54  
55  
56  
57  
58  
59  
60

## POLICE OFFICERS' WORK-LIFE BALANCE

## ABSTRACT

**Objectives:** To evaluate mental health-related outcomes of police officers five and a half years after implementing a new alternating shift schedule which was supposed to improve their health and work-life balance.

**Design:** Pre-post study design with a baseline survey at the beginning of the piloting of the new shift schedule in 2015 and another survey five and a half years later in 2020.

**Setting:** Police departments of a German metropolitan police force piloting the new shift schedule.

**Participants:** 116 shift-working police officers out of a population of 1673 police officers at the follow-up date.

**Interventions:** New shift schedule based on occupational health recommendations.

**Outcomes measures:** Work-life balance, job satisfaction and quality of life.

**Methods:** Mixed analyses of variances were used to test the hypotheses of within- and between-subject differences regarding time and gender.

**Results:** We found partly significant differences between the baseline and follow-up survey for work-life balance ( $F(1, 114) = 6.168, p = .014, \eta_p^2 = .051$ ), job satisfaction ( $F(1, 114) = 9.921, p = .002, \eta_p^2 = .080$ ) and quality of life ( $F(1, 114) = .593, p = .443, \eta_p^2 = .005$ ). Neither significant differences between male and female police officers nor interaction effects of time and gender were found.

**Conclusion:** An increase was found for each of the three outcomes five and a half years after implementing the new shift schedule. The results contribute to the current state of research on mental health-related outcomes of working conditions in shift work. On this basis, recommendations for designing shift schedules can be deduced to promote mental health and job satisfaction for employees in shift work.

## STRENGTHS AND LIMITATIONS OF THIS STUDY

- Changes in mental health-related outcomes among shift-working police officers were analysed using mixed analyses of variances to determine within- and between-subject differences before and after implementing a new shift schedule.
- The study was designed and conducted by an interdisciplinary team of psychologists, occupational physicians, health scientists and epidemiologists.
- The measurements were based on self-reports and thus may be subject to response bias.

## POLICE OFFICERS' WORK-LIFE BALANCE

- 1  
2  
3  
40 • Only a small proportion of the surveyed police officers could be matched over the measurement  
4  
5 41 points, resulting in a reduced sample size and limited representativity of results.  
6  
7  
8  
9  
10  
11  
12  
13  
14  
15  
16  
17  
18  
19  
20  
21  
22  
23  
24  
25  
26  
27  
28  
29  
30  
31  
32  
33  
34  
35  
36  
37  
38  
39  
40  
41  
42  
43  
44  
45  
46  
47  
48  
49  
50  
51  
52  
53  
54  
55  
56  
57  
58  
59  
60
- Only a small proportion of the surveyed police officers could be matched over the measurement points, resulting in a reduced sample size and limited representativity of results.

For peer review only

## INTRODUCTION

Police officers are exposed to various work-related demands in their jobs, with shift work being an inevitable one of them. Working in shifts, especially at night, is associated with several health risks, such as higher incidences of cardio-vascular diseases resulting from a disturbed circadian rhythm<sup>1-3</sup> and a potentially increased risk of cancer due to impaired melatonin secretion<sup>4-7</sup>. Furthermore, alternating shift work is associated with increased risk of sleep disturbances<sup>8</sup>, impaired mood and performance, and disrupted family and social relationships, which in turn can have a negative impact on physical and mental health<sup>9-13</sup>. Balancing work and leisure activities, such as partnership, family, caring for relatives, hobbies or voluntary work, thus poses a particular challenge for employees working in alternating shifts<sup>14</sup>. Similarly, job satisfaction is closely related to both physical and mental health<sup>15</sup>.

Particularly among shift-working police officers, prior research in the international context has focused on their sleep quality<sup>16,17</sup>, work-related stress(ors)<sup>18-20</sup>, trauma and associated suicidal ideation<sup>21-23</sup>. The risk of suicide is substantially higher compared to other occupational groups<sup>24</sup>. However, police officers' perceived work-related stress does not only result from their work content, but also results from their working conditions. For instance, irregular schedules, mandatory overtime and longer than 11-hour shifts have been associated with higher risk of burnout among police officers<sup>25</sup>. Police officers' indispensable shift work is associated with sickness absence<sup>26</sup> and predicts work-family conflict<sup>27</sup>. The latter also mediates between police officers' workload and job stress as well as job dissatisfaction<sup>28</sup>. Apart from its association with higher levels of job dissatisfaction<sup>29-32</sup>, police officers' work-life conflict is also related to burnout and stress<sup>33-35</sup>, more subjective health complaints and even suicidal ideation<sup>27</sup>.

Although significant gender differences, in general, but especially among police officers who were married and/or had children, were found regarding psychosocial stress<sup>36</sup>, further research findings highlight the significant relationship between stress and work-life balance<sup>37</sup> or work-family conflict<sup>38,39</sup> affecting police officers regardless of their gender. Similarly, several studies indicate that gender does neither predict police officers' job satisfaction nor differ significantly between males and females<sup>40-42</sup>, although contradictory results have been found<sup>43,44</sup>. Literature also provides inconsistent findings on police officers' gender and perceived quality of life. A Greek study suggests that female and male police officers' scores do not differ significantly overall, but females reported lower levels of subscales of health-related quality of life which is – like job satisfaction – negatively associated with perceived stress. However, significant interactions were not revealed<sup>44</sup>. Other studies have found no significant gender differences concerning police officers' quality of life<sup>45</sup>. However, research on police officers' quality of life is only recently emerging<sup>46,47</sup>.

## POLICE OFFICERS' WORK-LIFE BALANCE

1  
2  
3 75 In this context, an evaluation at a German metropolitan police force revealed an improved work-life  
4 76 balance among police officers after adapting the shift schedule according to occupational health  
5 77 recommendations<sup>48 49</sup>. Especially flexibility due to improved planning of free time and shorter shifts  
6 78 were regarded as more compatible with family and leisure time activities<sup>49</sup>. In a similar vein, a German  
7 79 metropolitan police force aspired to adapt their alternating shift schedule and evaluate their newly-  
8 80 developed shift schedule to improve their employees' health, work-life balance, job satisfaction and  
9 81 general health. The shift schedule was thus changed from a four-week rotation with 35 to 49 hours of  
10 82 work per week to an eight-week rhythm with 36 to 48 hours of work per week. The early duty week  
11 83 with six consecutive early mornings, at 5:30 a.m. and one Sunday off was abolished. Previously  
12 84 alternating day, late and night shifts, with 12.25 hours-day and night shifts in three subsequent weeks  
13 85 and days off (so-called "sleep-in days") after night shifts following this early duty week were replaced  
14 86 by two night shifts followed by two or three days off each week, resulting in at least one day off after  
15 87 the "sleep-in day". In contrast to the previous shift schedule, the new system also stipulated  
16 88 guaranteed days off without availability for special operations. 12-hour day and night shifts now  
17 89 usually occurred twice a week, in some weeks only once. A comparison of both shift schedule models  
18 90 regarding occupational health recommendations is provided in the supplementary materials' Table S1.

### 91 Objectives and hypotheses

92 As described above, the current state of research provides evidence that shift work can lead to work-  
93 family conflicts and affect mental health and job satisfaction among police officers. However, there is  
94 considerably less longitudinal research data demonstrating the effects of shift work systems on work-  
95 and health-related outcomes. As part of a broader evaluation of the potential effects of the new shift  
96 schedule on the working conditions at the metropolitan police, the aim of this study was to investigate  
97 within-and between-subject psychological effects of the new shift schedule. Further results of  
98 occupational health analyses<sup>50</sup> as well as analyses of sickness absence rates<sup>51</sup> are presented in separate  
99 articles. Within the evaluation process of the new shift schedule, we thus explored in the present study:  
100 How does the newly introduced shift schedule impact police officers' work-life balance, job satisfaction  
101 and quality of life? Is there a significant difference in work-life balance, job satisfaction and quality of  
102 life at the two time points before and after implementing the new shift schedule or regarding their  
103 gender?

104 Considering the state of research outlined above, we accordingly formulated the following hypotheses:

105 H<sub>1a</sub>: Police officers' perceived work-life balance will be significantly higher rated five and a half years  
106 after implementing the new shift schedule.

107 H<sub>1b</sub>: There will be no significant main effect of gender on police officers' perceived work-life balance.

## POLICE OFFICERS' WORK-LIFE BALANCE

108 H<sub>1c</sub>: There will be no significant interaction effect of police officers' gender and time on their perceived  
109 work-life balance.

110 H<sub>2a</sub>: Police officers' job satisfaction will be significantly higher five and a half years after implementing  
111 the new shift schedule.

112 H<sub>2b</sub>: There will be no significant main effect of gender on police officers' job satisfaction.

113 H<sub>2c</sub>: There will be no significant interaction effect of police officers' gender and time on their job  
114 satisfaction.

115 H<sub>3a</sub>: Police officers' perceived quality of life will be significantly higher five and a half years after  
116 implementing the new shift schedule.

117 H<sub>3b</sub>: There will be no significant main effect of gender on police officers' perceived quality of life.

118 H<sub>3c</sub>: There will be no significant interaction effect of police officers' gender and time on their perceived  
119 quality of life.

## 120 METHODS

### 121 Study design, population, and recruitment

122 The newly proposed shift schedule was piloted in a German metropolitan police force in a successive  
123 roll-out across all police stations (PS). In May 2015, the first metropolitan PS introduced the new shift  
124 schedule, followed by six other PS until the end of 2015. 16 further PS and the operations centre  
125 introduced the new shift schedule until September 2017, one last PS changed their shift schedule in  
126 the beginning of 2021. Data were collected at three time points using questionnaires. Only police  
127 officers of four relevant duty groups who worked in the alternating shift schedule were included in the  
128 study. Participating police officers worked at PS across the metropolitan area or the operations centre  
129 where emergency calls are received and handled. The first survey took place shortly before the piloting  
130 of the new rotating shift schedule started in May 2015 (T0), the second survey was conducted one year  
131 later, in June 2016 (T1), followed by the third survey was scheduled exactly five years later in May 2020  
132 but had to be postponed to December 2020 and early January 2021 due to the SARS-CoV-2 pandemic  
133 (T2). Each time, standardised questionnaires with a covering letter were distributed via the official post  
134 boxes to all police officers of the metropolitan police force working rotating shifts and belonging to the  
135 predefined duty groups. Participants were asked to provide an individual matching code based on  
136 digits and letters. The completed questionnaires could be placed anonymously in sealed ballot boxes  
137 within four weeks. The paper questionnaires were then digitised with the data collection software  
138 TeleForm® (Electric Paper Informationssysteme GmbH, Lüneburg, Germany). Despite the consistently  
139 high response rates, owing to lack of consent, many retirements, and new recruitments of police  
140 officers in the meantime, only 127 participants could be matched between T0 and T2. A further

## POLICE OFFICERS' WORK-LIFE BALANCE

141 matching with T1-participants would have resulted in a sample size too small to analyse. Therefore,  
142 only police officers participating in the baseline (T0) and follow-up (T2) surveys were matched. A  
143 flowchart of this process is provided in Figure 1.

144 ---- insert Figure 1 here ----

## 145 Measures

### 146 Sociodemographic and job characteristics

147 We gathered information on participants' gender, age, rank within the police force, shift work  
148 experience, type of employment and duty service, relationship status and number of children as well  
149 as being a single parent or caring for relatives or others.

### 150 Work-life balance

151 Work-life balance was measured with five items which were already deployed and considered reliable  
152 (Cronbach's  $\alpha = .92$ ) in a similar survey of another German metropolitan police force<sup>49</sup>. A sample item  
153 was "The coordination of my daily work routine with my private matters works well." All items were  
154 rated on a five-point Likert scale (1 = "I fully agree" to 5 = "I do not agree") and calculated as a score  
155 ranging from 0 (worst work-life balance) to 100 (best possible work-life balance).

### 156 Job satisfaction

157 We measured job satisfaction with seven items of the German version of the Copenhagen Psychosocial  
158 Questionnaire (COPSOQ) job satisfaction scale<sup>52</sup>. The items were presented on a four-point Likert scale,  
159 ranging from 1 = "very satisfied" to 4 = "very unhappy". A sample item was "Regarding your work in  
160 general. How pleased are you with your job as a whole, everything taken into consideration?" A score  
161 was computed based on the items, ranging from 0 (lowest job satisfaction) to 100 (highest job  
162 satisfaction). Both, the original and the latest COPSOQ study confirmed the German scale's validity and  
163 reliability (Cronbach's  $\alpha$  ranging from .79 to .82)<sup>52 53</sup>.

### 164 Quality of life

165 Quality of life was assessed using two items of the World Health Organization's questionnaire  
166 WHOQOL-Bref to calculate its global score ranging from 0 (worst quality of life) to 100 (best quality of  
167 life)<sup>54</sup>. Participants responded to the questions "Over the last two weeks, how would you rate your  
168 quality of life?" and "Over the last two weeks, how satisfied were you with your health?" on a scale  
169 from 1 = "very bad/unsatisfied" to 5 = "very good/satisfied". The instrument in its short version can be  
170 considered reliable (Cronbach's  $\alpha$  ranging from .57 to .88) and valid<sup>54</sup>.

## POLICE OFFICERS' WORK-LIFE BALANCE

## 171 Statistical analyses

172 After calculating the scores for work-life balance and job satisfaction, the data were tested regarding  
173 the assumptions of a mixed analysis of variance (mixed ANOVA). After a check for missing values and  
174 multivariate outliers, 11 cases were excluded, resulting in a final sample size of  $N = 116$ . Although most  
175 of the normality tests (Kolmogorov-Smirnov and Shapiro-Wilk) indicated no normality of the data,  
176 based on the sample size ( $N = 116$ ,  $n > 30$  for each group), normal Q-Q plots, skewness, and kurtosis  
177 values ( $< 1.0$ ), bivariate normal distribution of data could be assumed. The Pearson correlation matrix  
178 further indicated no multicollinearity ( $r < .63$ ). Box's test indicated homogeneity of covariance matrices  
179 ( $p > .05$ ) and Levene's tests indicated homoscedasticity ( $p > .05$ ) in all mixed ANOVA. Mauchly's test  
180 for sphericity was non-significant due to the analysis of two time points. Cohen's  $d$  was calculated from  
181  $\eta_p^2$  and used to evaluate the effect sizes, considering  $d = .20$  as a small effect,  $d = .50$  as a medium  
182 effect, and  $d = .80$  as a large effect<sup>55</sup>. In addition, mean scores and standard deviations were calculated  
183 for each time point individually and a sensitivity analysis was conducted for the follow-up survey (T2)  
184 to account for the different lengths of time police officers had worked with the new shift schedule (in  
185 months) as a covariate. All statistical analyses were performed with IBM® SPSS® Statistics (version 25;  
186 IBM Corp; Armonk, New York, USA),  $p < 0.05$  was considered as significant.

## 187 Patient and Public involvement

188 Patients or the public were not involved in the design, conduct, reporting, or dissemination plans of  
189 our research.

## 190 Ethical considerations

191 The study was approved by the Ethics Review Committee of the Hamburg Medical Association,  
192 Germany (PV4999 / WF-009/20). All participants provided informed consent for data collection after  
193 receiving information on data protection and analysis. Participants who did not provide informed  
194 consent were excluded from data analysis.

## 195 RESULTS

### 196 Participant characteristics

197 Most participants were male (70.7%). Most of the participating police officers were aged between 35  
198 and 39 years (21.6 %; also median and modal age category) and worked in upper police service (65.5%).  
199 Two thirds of them had already worked in shift work for more than ten years (66.4%). Almost 90%  
200 worked fulltime and 68% had been predominantly on patrol duty in the past weeks before completing



## POLICE OFFICERS' WORK-LIFE BALANCE

201 the survey. Participants also mostly lived in a permanent relationship (83.6%) and had at least one  
 202 child (60.3%). Only less than 2% were single parents and slightly more (2.6%) cared for relatives or  
 203 others alongside their job. Police officers' sociodemographic characteristics at baseline (T0) are  
 204 provided in more detail in Table 1.

205 **Table 1. Sociodemographic characteristics of participants at baseline T0 (N = 116).**

| Characteristics                   | <i>n</i> | %    |
|-----------------------------------|----------|------|
| Gender                            |          |      |
| Male                              | 82       | 70.7 |
| Female                            | 34       | 29.3 |
| Age                               |          |      |
| 20-24 years                       | 4        | 3.4  |
| 25-29 years                       | 16       | 13.8 |
| 30-34 years                       | 19       | 16.4 |
| 35-39 years                       | 25       | 21.6 |
| 40-44 years                       | 15       | 12.9 |
| 45-49 years                       | 17       | 14.7 |
| 50-54 years                       | 19       | 16.4 |
| ≥ 55 years                        | 1        | .9   |
| Rank                              |          |      |
| Intermediate police service       | 40       | 34.5 |
| Upper police service              | 76       | 65.5 |
| Shift work experience             |          |      |
| ≤ 5 years                         | 21       | 18.1 |
| 5-10 years                        | 18       | 15.5 |
| ≥ 10 years                        | 77       | 66.4 |
| Type of employment                |          |      |
| Part-time                         | 12       | 10.3 |
| Fulltime                          | 104      | 89.7 |
| Type of duty service <sup>1</sup> |          |      |
| Exclusively office duty           | 22       | 19.0 |
| Predominantly office duty         | 8        | 6.9  |
| Office and patrol duty (50:50)    | 7        | 6.0  |
| Predominantly patrol duty         | 79       | 68.1 |
| Permanent relationship            |          |      |
| Yes                               | 97       | 83.6 |
| No                                | 18       | 15.5 |
| No information given              | 1        | .9   |
| Children                          |          |      |
| None                              | 46       | 39.7 |
| One child                         | 20       | 17.2 |
| Two children                      | 35       | 30.2 |
| Three children                    | 12       | 10.3 |
| Four children                     | 3        | 2.6  |
| Single parent                     |          |      |
| Yes                               | 2        | 1.7  |
| No                                | 100      | 86.2 |
| No information given              | 14       | 12.1 |

## POLICE OFFICERS' WORK-LIFE BALANCE

|                                          |     |      |
|------------------------------------------|-----|------|
| Caring for relatives/others              |     |      |
| Yes                                      | 3   | 2.6  |
| No                                       | 113 | 97.4 |
| Time working with the new shift schedule |     |      |
| ≤ 24 months                              | 4   | 4.1  |
| 25-48 months                             | 31  | 26.7 |
| ≥ 49 months                              | 63  | 54.3 |
| No information                           | 18  | 15.5 |

206 *Note.* <sup>1</sup>Refers to type of service exercised in the last four weeks prior to taking the survey.

207 Descriptive statistics at all three time points indicated increasing mean scores with each survey. Work-  
 208 life balance, job satisfaction and quality of life have been rated higher consecutively at each time point.  
 209 For work-life balance and job satisfaction, the difference of means was greater over the longer period  
 210 between T1 and T2 compared to T0 and T1. For quality of life, by contrast, the difference was greater  
 211 between T0 and T1, whereas between T1 and T2 only a smaller difference of the mean could be  
 212 observed, as displayed in Table S2 in the supplementary material.

### 213 Within-subjects effects of time

214 The descriptive cross-sectional findings of each measurement point were also found in the matched  
 215 sample of baseline and follow-up mean scores we used for the principal analyses. Means of all three  
 216 dependent variables were higher at T2 than at T0 (see Table 2). The mixed ANOVA revealed significant  
 217 small and medium-sized main effects for the within-subjects effects on police officers' work-life  
 218 balance ( $F(1, 114) = 6.168, p = .014, \eta_p^2 = .051, d = .464$ ) and job satisfaction ( $F(1, 114) = 9.921, p = .002,$   
 219  $\eta_p^2 = .080, d = .590$ ), thereby confirming hypotheses  $H_{1a}$  and  $H_{2a}$ . The main effect for quality of life was  
 220 not significant ( $F(1, 114) = .593, p = .443, \eta_p^2 = .005$ ). Hypothesis  $H_{3a}$  thus had to be rejected.

221 **Table 2. Means and standard deviations for work-life balance, job satisfaction and quality of life ( $N$**   
 222 **= 116).**

|           |                      | Work-life balance |           | Job satisfaction |           | Quality of life |           |
|-----------|----------------------|-------------------|-----------|------------------|-----------|-----------------|-----------|
|           |                      | <i>M</i>          | <i>SD</i> | <i>M</i>         | <i>SD</i> | <i>M</i>        | <i>SD</i> |
| <b>T0</b> | Males <sup>1</sup>   | 50.305            | 21.305    | 66.148           | 11.538    | 62.805          | 17.675    |
|           | Females <sup>2</sup> | 57.794            | 22.670    | 65.314           | 10.308    | 65.809          | 19.294    |
|           | Total                | 52.500            | 21.884    | 65.904           | 11.153    | 63.685          | 18.131    |
| <b>T2</b> | Males <sup>1</sup>   | 59.817            | 24.145    | 70.635           | 12.637    | 64.787          | 18.750    |
|           | Females <sup>2</sup> | 63.971            | 21.098    | 70.777           | 12.370    | 67.647          | 22.638    |
|           | Total                | 61.034            | 23.280    | 70.677           | 12.506    | 65.625          | 19.910    |

223 *Note.* <sup>1</sup> $n = 82.$  <sup>2</sup> $n = 34.$

## POLICE OFFICERS' WORK-LIFE BALANCE

224 **Between-subjects effects of gender and interactions**

225 Regarding the between-subjects effects, the mixed ANOVA showed that no significant main effect of  
226 gender ( $F(1,114) = 3.046, p = .084, \eta_p^2 = .026$ ) on perceived work-life balance. While female police  
227 officers' mean rating increased by six points, their male colleagues' mean rating increased by almost  
228 ten points from T0 to T2 (see Table 2), the difference was not significant and both groups showed the  
229 same pattern. Therefore, no significant interaction between time and gender ( $F(1,114) = .279, p = .598,$   
230  $\eta_p^2 = .002$ ) was found. Figure 2 illustrates that both, males and females showed a similarly sized  
231 increase for work-life balance across time. These findings support our hypotheses  $H_{1b-c}$ .

232 Likewise, no significant difference was found between male and female police officers with regard to  
233 their job satisfaction ( $F(1,114) = .035, p = .851, \eta_p^2 = .000$ ), supporting hypothesis  $H_{2b}$ . Female and male  
234 participants' mean job satisfaction increased comparably from T0 to T2 (see Table 2). However, women  
235 reported marginally higher values at T2 (+.142 points compared to their male colleagues). Therefore,  
236 the profile plot in Figure 3 depicts slightly crossing lines. Nevertheless, in support of hypothesis  $H_{2c}$ , no  
237 significant interaction between time and gender ( $F(1,114) = .095, p = .758, \eta_p^2 = .001$ ) was found for  
238 job satisfaction either.

239 In line with hypothesis  $H_{3b}$ , we found no significant differences in quality of life means between males  
240 and females ( $F(1,114) = .956, p = .330, \eta_p^2 = .008$ ). Female police officers rated their quality of life higher  
241 than their male colleagues at both time points but both means increased at the same rate (see Table  
242 2). Therefore, no interaction between time and gender was found ( $F(1,114) = .001, p = .977, \eta_p^2 = .000$ ),  
243 as assumed in hypothesis  $H_{3c}$  and depicted in Figure 4.

244 ---- insert Figures 2-4 here ----

245 Sensitivity analyses with data from the follow up-survey (T2,  $n = 893$  for work-life balance,  $n = 881$  for  
246 job satisfaction and  $n = 907$  for quality of life) indicated that when controlling for the length of time  
247 police officers had worked according to the new shift schedule, between-subject differences did not  
248 change and remained insignificant regardless of whether the exposure duration was added to the  
249 model or not.

250 **DISCUSSION**

251 In the present study, we analysed within- and between-subject differences of three work-related  
252 mental health outcomes among police officers of a German metropolitan police department at two  
253 time points. The baseline data were compared to the survey results five and a half years later, after  
254 implementing a new shift schedule which was supposed to improve mental and physical health of the

## POLICE OFFICERS' WORK-LIFE BALANCE

1  
2  
3 255 police officers. Our findings provide support for most of our hypotheses: work-life balance and job  
4  
5 256 satisfaction scores significantly increased between the baseline survey and the follow-up. Quality of  
6  
7 257 life increased as well, but not to a statistically significant extent. At both time points, female police  
8  
9 258 officers reported higher levels of work-life balance and quality of life, whereas male participants rated  
10  
11 259 their job satisfaction higher at the baseline. However, no significant differences were found between  
12  
13 260 male and female police officers regarding their work-life balance, job satisfaction and quality of life.  
14  
15 261 Notably, the greatest increase over the five and a half years could be observed in the work-life balance  
16  
17 262 of police officers, followed by job satisfaction and quality of life.

17 263 Consistent with previous findings, restricted work-life balance due to the shift schedule affected male  
18  
19 264 and female police officers equally<sup>37-39</sup>. Sociodemographic characteristics revealed that most of the  
20  
21 265 participants had children and lived in a permanent relationship, whereas only very few participants  
22  
23 266 were single parents. This may indicate that parents shared their care for children or other relatives and  
24  
25 267 that traditional gender roles are being undone<sup>37</sup>. However, work-life balance does not only include  
26  
27 268 balancing work and family matters but also social life and leisure activities. Our results are further  
28  
29 269 supported by findings of a another German metropolitan police force that evaluated similar shift  
30  
31 270 schedules which served as a blueprint for the one we evaluated<sup>48 49</sup>. Accordingly, shift schedules with  
32  
33 271 more flexible working time arrangements reduced the impact of work-life balance as a potential  
34  
35 272 stressor and that work-life balance was negatively related to police officers' perceived strain<sup>48</sup>.

35 273 At both time points, job satisfaction means exceeded those reported by the international and German  
36  
37 274 general working population<sup>53 56</sup>, indicating a high job satisfaction among our participants overall. In line  
38  
39 275 with our results, recent findings suggest that changing the shift schedule could have a positive  
40  
41 276 influence on police officers' job satisfaction<sup>57</sup>. In partial contradiction with our findings, male police  
42  
43 277 officers reported lower job satisfaction compared to female colleagues in a Greek sample, while female  
44  
45 278 police officers reported lower values of health-related quality of life compared to their male  
46  
47 279 colleagues<sup>44</sup>. However, the slightly greater increase of job satisfaction ratings among female  
48  
49 280 participants in our sample could indicate a gradually closing gender gap with the new shift schedule in  
50  
51 281 this regard. Yet the results need to be interpreted very cautiously and need to be further evaluated in  
52  
53 282 the long-term, as the differences were small and not significant.

52 283 Compared to norm values, quality of life was rated lower in our sample at both time points<sup>54</sup>. A cross-  
53  
54 284 sectional study among criminal police officers also revealed lower health-related quality of life scores  
55  
56 285 compared to results from general populations<sup>46</sup>. Nevertheless, it becomes apparent that the quality of  
57  
58 286 life marginally increased after implementing the new shift schedule, although to a non-significant and  
59  
60 287 lesser extent than work-life balance and job satisfaction. Further analyses indicated that the working  
60 288 conditions of the new shift schedule, especially the increased number of 12-hour shifts, did not have

## POLICE OFFICERS' WORK-LIFE BALANCE

289 a detrimental impact on the police officers' quality of life<sup>50</sup>. Why the scores for work-life balance and  
290 job satisfaction but not for quality of life between males and females seem to align over time thus  
291 remains unclear. As research on police officers' quality of life has been unfolding recently, future  
292 research will hopefully provide more insights on such differences and further associations.

### 293 Limitations

294 Based on longitudinal data, we were able to examine changes in health-related outcomes among shift-  
295 working police officers before and after implementing a new shift schedule and thus contributed to a  
296 deeper understanding of these outcomes associated with working conditions in shift schedules.  
297 However, some limitations need to be discussed. Although we were able to gather and analyse data  
298 over three different time points, we could only evaluate the baseline and follow-up data in a  
299 longitudinal design. Despite high response rates, lack of given consent to evaluate the data,  
300 retirements and new recruits led to an insufficient sample size after matching participants across all  
301 three time points. Since the piloting was carried out as a successive rollout, not all of the PS surveyed  
302 had introduced the new shift schedule or had sufficient experience with the new shift schedule after  
303 one year (T1). We therefore dropped the data of the second evaluation for longitudinal analyses to  
304 present longer-term rather than short-term effects. Information on short-term changes one year after  
305 the baseline (i.e. piloting of the new shift schedule) are therefore not included in the present analyses.  
306 Due to the small sample size, we did not include the exposure duration of the new shift schedule as a  
307 covariate into the primary analysis. However, sensitivity analyses conducted on the larger data set of  
308 the cross-sectional data from the follow-up survey (T2) showed that the effects did not change when  
309 the covariate was added to the model. Neither did age have a significant effect, according to further  
310 analyses. Although we were able to analyse a larger sample size by considering the baseline and follow-  
311 up only, the matched sample differs from the population of shift-working police officers at T2 in age  
312 and gender and is therefore not representative of the current metropolitan police force which is now  
313 younger and includes more female police officers<sup>50</sup>, again due to retirements and new recruitments.  
314 The results from this sample might also not necessarily valid for other police forces. Moreover, the  
315 analysed data stem from self-reports of the participants and are thus susceptible to bias such as socially  
316 desirable answers. Motivational efforts may also have had an effect on the participants' responses, as  
317 the results of the evaluation served as a decision-making basis on the continuation of the piloted shift  
318 schedule. Furthermore, selection effects such as the healthy worker effect may influence the results.  
319 Answers from colleagues who were under a lot of strain, ill or not able to work, who retired early or  
320 changed their profession may have not been reflected in the results which may therefore appear more  
321 positive than they would be based on the whole relevant police work force. Lastly, merely effects up  
322 to five and a half years after implementing the new shift schedule became evident in this study. Longer-

## POLICE OFFICERS' WORK-LIFE BALANCE

323 term effects will have to be further evaluated in the future to be able to assess the new shift schedule  
324 in this respect.

### 325 Implications for research and practice

326 Our results provide evidence that changing a shift schedule according to occupational health  
327 recommendations improved police officers work-life balance and job satisfaction. Nevertheless, it  
328 must be taken into account that according to German labour legislation the implementation of 12-  
329 hour duties, which is implemented based on European law, requires special permissions and should  
330 be strictly limited to the minimum necessary to cover the service. Working in shifts or at nonstandard  
331 hours interferes with leisure time and can thus restrict social life or even parenting functioning  
332 resources<sup>14 58</sup>. The costs and benefits of longer duties and consecutive off-duty periods therefore must  
333 be weighed carefully. For a better work-life balance and prevention of detrimental health effects, shifts  
334 should be variable and predictable<sup>14 48 59</sup>. This was implemented with the new shift schedule and  
335 acknowledged in additional free text answers participants gave in the follow-up survey. To better  
336 balance police work with care work that occurs in specific stages of life, such as raising children or  
337 caring for relatives, more flexible working time models could be supportive. In relation to the entire  
338 working life, working time could be reduced in such phases, therefore enabling a better balance of  
339 private and professional life<sup>48</sup>. After successfully implementing the new shift schedule, further health-  
340 promoting measures should be offered to police officers. Research findings suggest that educational-  
341 based family-friendly programmes should be established in PS<sup>60</sup>. Moreover, several health promotion  
342 programmes for police forces have been evaluated recently<sup>61-63</sup>. At least in online trainings, it seems  
343 to be harder to change mental health and attitudes toward suicide compared to knowledge and  
344 competence, as an intervention study among German-speaking police officers implies<sup>64</sup>. In this vein,  
345 mindfulness-based health promotion was recently shown to be feasible and efficacious to improve  
346 quality of life among Brazilian officers<sup>61</sup>. It is also recommended to identify police officers' risk factors  
347 for mental health early to be able to prevent and promote their quality of life<sup>65</sup>. Job control and a  
348 flexibility-oriented culture can positively influence job satisfaction<sup>66</sup>. Continuous participation of police  
349 officers should be maintained to shape and continuously adapt the change process of implementing  
350 the new shift schedule<sup>48</sup>. Regularly conducted risk assessments can provide a basis for this and identify  
351 such stressors to counteract them preventively.

## 352 CONCLUSION

353 The results of this longitudinal study demonstrated small positive changes five and a half years after  
354 adapting a German metropolitan police force's alternating shift schedule. The new shift schedule  
355 providing more 12-hour shifts as well as more off-duty days enabled police officers to better balance

## POLICE OFFICERS' WORK-LIFE BALANCE

private and work-related demands regardless of their gender. The altered working conditions were also reflected in higher job satisfaction, whereas the increase in quality of life was not significant. Despite the benefits of more predictable scheduling and free time in the new shift schedule, more frequent 12-hour shifts during the day and night may entail adverse health effects in the long run. Therefore, larger cohort studies and evaluations over a longer period with several measurement points are recommended to verify the effects and continuously monitor its consequences for police officers.

## STATEMENTS

**Dedication:** We respectfully dedicate this paper to the memory of our colleague Cordula Bittner (1968-2019), who led the first part of the evaluation (2015-2016) ensuring a fruitful dialogue between researchers and police, which laid the foundation for the further evaluation 2021.

**Acknowledgements:** We would like to thank all police officers who supported the evaluation process and those who participated in the surveys. Furthermore, we would like to acknowledge Niklas Kiepe, Lea Rischke and Joelle-Cathrin Flöther for their support in digitising the data.

**Authors' contributions:** ER drafted the manuscript and conducted data analyses. ER, MVG and RH prepared the data for analyses. ER, MVG, RH, AMP, CT, VH and SM participated in designing the study. MVG, RH, AMP, CT, VH and SM supervised the study and data analyses. MVG administered the project. MVG, RH, AMP, CT, VH and SM contributed in the drafting of the manuscript. All authors read and approved the final manuscript.

**Ethics approval:** The study was approved by the Ethics Review Committee of the Hamburg Medical Association, Germany (PV4999 / WF-009/20).

**Funding:** This work was supported by Polizei Hamburg (grant number: N/A).

**Competing interests:** All authors declare no competing interests.

**Data sharing statement:** The data cannot be made available due to the contractual provision with the cooperation partner.

## REFERENCES

1. Gu F, Han J, Laden F, et al. Total and cause-specific mortality of U.S. nurses working rotating night shifts. *Am J Prev Med* 2015;48:241-52. doi: 10.1016/j.amepre.2014.10.018
2. Vetter C, Devore EE, Wegrzyn LR, et al. Association Between Rotating Night Shift Work and Risk of Coronary Heart Disease Among Women. *Jama* 2016;315(16):1726-34. doi: 10.1001/jama.2016.4454
3. Vyas MV, Garg AX, Iansai AV, et al. Shift work and vascular events: systematic review and meta-analysis. *BMJ* 2012;345:e4800. doi: 10.1136/bmj.e4800

## POLICE OFFICERS' WORK-LIFE BALANCE

- 1  
2  
3 388 4. Ijaz S, Verbeek J, Seidler A, et al. Night-shift work and breast cancer--a systematic review and meta-  
4 389 analysis. *Scand J Work Environ Health* 2013;39:431-47. doi: 10.5271/sjweh.3371
- 5 390 5. Jia Y, Lu Y, Wu K, et al. Does night work increase the risk of breast cancer? A systematic review and  
6 391 meta-analysis of epidemiological studies. *Cancer Epidemiol* 2013;37:197-206. doi:  
7 392 10.1016/j.canep.2013.01.005
- 8 393 6. Rao D, Yu H, Bai Y, et al. Does night-shift work increase the risk of prostate cancer? a systematic  
9 394 review and meta-analysis. *Onco Targets Ther* 2015;8:2817-26. doi: 10.2147/OTT.S89769
- 10 395 7. Wang X, Ji A, Zhu Y, et al. A meta-analysis including dose-response relationship between night shift  
11 396 work and the risk of colorectal cancer. *Oncotarget* 2015;6:25046-60. doi:  
12 397 10.18632/oncotarget.4502
- 13 398 8. Sallinen M, Kecklund G. Shift work, sleep, and sleepiness – differences between shift schedules and  
14 399 systems. *Scand J Work Environ Health* 2010;36:121-33. doi: 10.5271/sjweh.2900
- 15 400 9. Brown JP, Martin D, Nagaria Z, et al. Mental Health Consequences of Shift Work: An Updated Review.  
16 401 *Curr Psychiatry Rep* 2020;22(2):7. doi: 10.1007/s11920-020-1131-z
- 17 402 10. Folkard S. Effects on performance efficiency. In: Colquhoun WP, Costa G, Folkard S, et al., eds.  
18 403 Shiftwork Problems and Solutions. Frankfurt am Main: Peter Lang 1996:65-87.
- 19 404 11. Monk TH, Folkard S, Wedderburn AI. Maintaining safety and high performance on shiftwork. *Appl*  
20 405 *Ergon* 1996;27:17-23. doi: 10.1016/0003-6870(95)00048-8
- 21 406 12. Wüthrich P. Studie über die gesundheitlichen, sozialen und psychischen Auswirkungen der Nacht-  
22 407 und Schichtarbeit [Study on the health, social and psychological effects of night and shift work].  
23 408 Bern: Schweizerischer Gewerkschaftsbund, 2003.
- 24 409 13. Deutsche Gesellschaft für Arbeitsmedizin und Umweltmedizin. Nacht- und Schichtarbeit. S1-  
25 410 Leitlinie der Deutschen Gesellschaft für Arbeitsmedizin und Umweltmedizin [Night work and  
26 411 shift work. S1 Guideline of the German Society for Occupational and Environmental Medicine],  
27 412 2006.
- 28 413 14. Wöhrmann AM, Müller G, Ewert K. Shift Work and Work-Family Conflict: A Systematic Review.  
29 414 *Sozialpolitik* 2020;3(2):1-26. doi: 10.18753/2297-8224-165
- 30 415 15. Faragher EB, Cass M, Cooper CL. The Relationship between Job Satisfaction and Health: A Meta-  
31 416 Analysis. In: Cooper CL, ed. From Stress to Wellbeing Volume 1: The Theory and Research on  
32 417 Occupational Stress and Wellbeing. London: Palgrave Macmillan UK 2013:254-71.
- 33 418 16. Garbarino S, Guglielmi O, Puntoni M, et al. Sleep Quality among Police Officers: Implications and  
34 419 Insights from a Systematic Review and Meta-Analysis of the Literature. *Int J Environ Res Public*  
35 420 *Health* 2019;16(5):885. doi: 10.3390/ijerph16050885
- 36 421 17. Garbarino S, De Carli F, Nobili L, et al. Sleepiness and sleep disorders in shift workers: a study on a  
37 422 group of italian police officers. *Sleep* 2002;25 6:648-53.
- 38 423 18. Garbarino S, Cuomo G, Chiorri C, et al. Association of work-related stress with mental health  
39 424 problems in a special police force unit. *BMJ Open* 2013;3(7):e002791. doi: 10.1136/bmjopen-  
40 425 2013-002791
- 41 426 19. Violanti JM, Fekedulegn D, Hartley TA, et al. Highly Rated and most Frequent Stressors among  
42 427 Police Officers: Gender Differences. *American journal of criminal justice : AJCJ* 2016;41(4):645-  
43 428 62. doi: 10.1007/s12103-016-9342-x
- 44 429 20. Violanti JM, Charles LE, McCanlies E, et al. Police stressors and health: a state-of-the-art review.  
45 430 *Policing* 2017;40(4):642-56. doi: 10.1108/PIJPSM-06-2016-0097
- 46 431 21. Violanti JM, Charles LE, Hartley TA, et al. Shift-work and suicide ideation among police officers. *Am*  
47 432 *J Ind Med* 2008;51(10):758-68. doi: 10.1002/ajim.20629
- 48 433 22. Violanti JM. Predictors of police suicide ideation. *Suicide & life-threatening behavior*  
49 434 2004;34(3):277-83. doi: 10.1521/suli.34.3.277.42775
- 50 435 23. Hem E, Berg AM, Ekeberg Ø. Suicide in Police—A Critical Review. *Suicide & life-threatening behavior*  
51 436 2001;31(2):224-33. doi: 10.1521/suli.31.2.224.21513
- 52 437 24. Violanti JM, Vena JE, Marshall JR. Suicides, homicides, and accidental death: a comparative risk  
53 438 assessment of police officers and municipal workers. *Am J Ind Med* 1996;30(1):99-104. doi:  
54  
55  
56  
57  
58  
59  
60



## POLICE OFFICERS' WORK-LIFE BALANCE

- 1  
2  
3 439 10.1002/(sici)1097-0274(199607)30:1<99::Aid-ajim17>3.0.Co;2-3 [published Online First:  
4 440 1996/07/01]  
5 441 25. Peterson SA, Wolkow AP, Lockley SW, et al. Associations between shift work characteristics, shift  
6 442 work schedules, sleep and burnout in North American police officers: a cross-sectional study.  
7 443 *BMJ Open* 2019;9(11):e030302. doi: 10.1136/bmjopen-2019-030302  
8 444 26. Fekedulegn D, Burchfiel CM, Hartley TA, et al. Shiftwork and Sickness Absence Among Police  
9 445 Officers: The BCOPS Study. *Chronobiol Int* 2013;30(7):930-41. doi:  
10 446 10.3109/07420528.2013.790043  
11 447 27. Mikkelsen A, Burke RJ. Work-family concerns of Norwegian police officers: Antecedents and  
12 448 consequences. *Int J Stress Manag* 2004;11(4):429-44. doi: 10.1037/1072-5245.11.4.429  
13 449 28. Sadiq M. Policing in pandemic: Is perception of workload causing work-family conflict, job  
14 450 dissatisfaction and job stress? *J Public Aff* 2022;22(2):e2486. doi: 10.1002/pa.2486  
15 451 29. Islam T, Khan MM, Ahmed I, et al. Work-family conflict and job dissatisfaction among police officers:  
16 452 mediation of threat to family role and moderation of role segmentation enhancement. *Policing*  
17 453 2020;43(2):403-15. doi: 10.1108/PIJPSM-06-2019-0087  
18 454 30. Rathi N, Barath M. Work - family conflict and job and family satisfaction. *Equal Divers Incl*  
19 455 2013;32(4):438-54. doi: 10.1108/EDI-10-2012-0092  
20 456 31. Frank J, Lambert EG, Qureshi H, et al. Problems spilling over: work-family conflict's and other  
21 457 stressor variables' relationships with job involvement and satisfaction among police officers. *J*  
22 458 *Polic Intell Count Terror* 2021:1-24. doi: 10.1080/18335330.2021.1946711  
23 459 32. Gary Howard W, Howard Donofrio H, Boles JS. Inter - domain work - family, family - work conflict  
24 460 and police work satisfaction. *Policing* 2004;27(3):380-95. doi: 10.1108/13639510410553121  
25 461 33. Griffin JD, Sun IY. Do Work-Family Conflict and Resiliency Mediate Police Stress and Burnout: a  
26 462 Study of State Police Officers. *AJCI* 2018;43(2):354-70. doi: 10.1007/s12103-017-9401-y  
27 463 34. Lambert EG, Qureshi H, Keena LD, et al. Exploring the link between work-family conflict and job  
28 464 burnout among Indian police officers. *Police J* 2019;92(1):35-55. doi:  
29 465 10.1177/0032258x18761285  
30 466 35. Bazana S, Dodd N. Conscientiousness, Work Family Conflict and Stress amongst Police Officers in  
31 467 Alice, South Africa. *J Psychol* 2013;4(1):1-8. doi: 10.1080/09764224.2013.11885487  
32 468 36. Kurtz DL. Roll call and the second shift: the influences of gender and family on police stress. *Police*  
33 469 *Pract Res* 2012;13(1):71-86. doi: 10.1080/15614263.2011.596714  
34 470 37. Duxbury L, Bardoel A, Halinski M. 'Bringing the Badge home': exploring the relationship between  
35 471 role overload, work-family conflict, and stress in police officers. *Policing Soc* 2021;31(8):997-  
36 472 1016. doi: 10.1080/10439463.2020.1822837  
37 473 38. He N, Zhao J, Archbold CA. Gender and police stress. *Policing* 2002;25(4):687-708. doi:  
38 474 10.1108/13639510210450631  
39 475 39. Janzen BL, Muhajarine N, Kelly IW. Work-Family Conflict, and Psychological Distress in Men and  
40 476 Women among Canadian Police Officers. *Psychol Rep* 2007;100(2):556-62. doi:  
41 477 10.2466/pr0.100.2.556-562  
42 478 40. Dantzer M, Kubin B. Job satisfaction: The gender perspective among police officers. *AJCI*  
43 479 1998;23(1):19-31.  
44 480 41. Miller HA, Mire S, Kim B. Predictors of job satisfaction among police officers: Does personality  
45 481 matter? *J Crim Justice* 2009;37(5):419-26. doi: 10.1016/j.jcrimjus.2009.07.001  
46 482 42. Johnson RR. Police Officer Job Satisfaction: A Multidimensional Analysis. *Police Q* 2012;15(2):157-  
47 483 76. doi: 10.1177/1098611112442809  
48 484 43. Lu L, Liu L, Sui G, et al. The Associations of Job Stress and Organizational Identification with Job  
49 485 Satisfaction among Chinese Police Officers: The Mediating Role of Psychological Capital. *Int J*  
50 486 *Environ Res Public Health* 2015;12(12):15088-99.  
51 487 44. Alexopoulos EC, Palatsidi V, Tigani X, et al. Exploring Stress Levels, Job Satisfaction, and Quality of  
52 488 Life in a Sample of Police Officers in Greece. *Saf Health at Work* 2014;5(4):210-15. doi:  
53 489 10.1016/j.shaw.2014.07.004  
54  
55  
56  
57  
58  
59  
60

## POLICE OFFICERS' WORK-LIFE BALANCE

- 1  
2  
3 490 45. Arroyo TR, Borges MA, Lourenção LG. Health and quality of life of military police officers. *Brazilian*  
4 491 *J Health Promot* 2019;32(7738):1-9. doi: 10.5020/18061230.2019.7738
- 5 492 46. Wu X, Liu Q, Li Q, et al. Health-Related Quality of Life and Its Determinants among Criminal Police  
6 493 Officers. *Int J Environ Res Public Health* 2019;16(8):1398. doi: 10.3390/ijerph16081398
- 7 494 47. Morales-Manrique CC, Valderrama-Zurián JC. Quality of life in police officers: What is known and  
8 495 proposals. *Pap Psicol* 2012;33(1):60-67.
- 9 496 48. Härtwig C, Sporbert A. Evaluation der Einführung verschiedener Arbeitszeitmodelle. Befunde einer  
10 497 quasi-experimentellen Längsschnittstudie bei der Polizei [Evaluation of the introduction of  
11 498 different working time models: Findings of a quasiexperimental longitudinal study at the  
12 499 police]. *Z Arbeitswiss* 2013;67(4):243-51. doi: 10.1007/BF03374413
- 13 500 49. Hoff E-H, Härtwig C, Sporbert A. Wissenschaftliche Begleitung und Evaluation zur Einführung neuer  
14 501 Arbeitszeitmodelle bei der Polizei Berlin. Abschlussbericht 31. Juli 2012 [Scientific monitoring  
15 502 and evaluation of the introduction of new working time models at the Berlin Police. Final  
16 503 report 31 July 2012] Berlin: Freie Universität Berlin; 2012 [Available from:  
17 504 <https://www.parlament-berlin.de/ados/17/InnSichO/protokoll/iso17-035-ip-Anlage.pdf>  
18 505 accessed 8 February 2022].
- 19 506 50. Velasco Garrido M, Herold R, Rohwer E, et al. Evolution of work ability, quality of life and self-rated  
20 507 health in a police department after remodelling shift schedule. *BMC Public Health*  
21 508 2022;22(1670) doi: 10.1186/s12889-022-14098-5
- 22 509 51. Herold R, Velasco Garrido M, Rohwer E, et al. *in preparation* 2022
- 23 510 52. Nübling M, Stöbel U, Hasselhorn HM, et al. Methoden zur Erfassung psychischer Belastung –  
24 511 Erprobung eines Messinstrumentes (COPSOQ) [Methods for assessing mental stress - testing  
25 512 a measurement instrument (COPSOQ)]. Dortmund/Berlin/Dresden: Bundesanstalt für  
26 513 Arbeitsschutz und Arbeitsmedizin, 2005.
- 27 514 53. Lincke H-J, Vomstein M, Lindner A, et al. COPSOQ III in Germany: validation of a standard  
28 515 instrument to measure psychosocial factors at work. *J Occup Med Toxicol* 2021;16(1):50. doi:  
29 516 10.1186/s12995-021-00331-1
- 30 517 54. Angermeyer M, Kilian R, Matschinger H. WHOQOL-100 und WHOQOL-BREF. Handbuch für die  
31 518 deutschsprachigen Versionen der WHO Instrumente zur Erfassung von Lebensqualität  
32 519 [WHOQOL-100 and WHOQOL-BREF. Manual for the German-language versions of the WHO  
33 520 quality of life instruments]. Göttingen: Hogrefe 2000.
- 34 521 55. Cohen J. *Statistical Power Analysis for the Behavioral Sciences*. 2 ed. Hillsdale, NJ: Lawrence  
35 522 Erlbaum Associates 1988.
- 36 523 56. Burr H, Berthelsen H, Moncada S, et al. The Third Version of the Copenhagen Psychosocial  
37 524 Questionnaire. *Saf Health Work* 2019;10(4):482-503. doi: 10.1016/j.shaw.2019.10.002
- 38 525 57. Paoline EA, Gau JM. An Empirical Assessment of the Sources of Police Job Satisfaction. *Police Q*  
39 526 2020;23(1):55-81. doi: 10.1177/1098611119875117
- 40 527 58. Zhao Y, Cooklin A, Butterworth P, et al. How does working nonstandard hours impact psychological  
41 528 resources important for parental functioning? Evidence from an Australian longitudinal cohort  
42 529 study. *SSM Popul Health* 2021;16:100931. doi: 10.1016/j.ssmph.2021.100931
- 43 530 59. Scholarios D, Hesselgreaves H, Pratt R. Unpredictable working time, well-being and health in the  
44 531 police service. *Int J Hum Resour Manag* 2017;28(16):2275-98. doi:  
45 532 10.1080/09585192.2017.1314314
- 46 533 60. Youngcourt SS, Huffman AH. Family-friendly policies in the police: Implications for work-family  
47 534 conflict. *Appl Psychol Crim Justice* 2005;1(2):138-62.
- 48 535 61. Trombka M, Demarzo M, Campos D, et al. Mindfulness Training Improves Quality of Life and  
49 536 Reduces Depression and Anxiety Symptoms Among Police Officers: Results From the POLICE  
50 537 Study—A Multicenter Randomized Controlled Trial. *Front Psychiatry* 2021;12 doi:  
51 538 10.3389/fpsy.2021.624876
- 52 539 62. Liakopoulou D, Tigani X, Varvogli L, et al. Stress management and health promotion intervention  
53 540 program for police forces. *Int J Police Sci Manag* 2020;22(2):148-58. doi:  
54 541 10.1177/1461355719898202

## POLICE OFFICERS' WORK-LIFE BALANCE

- 1  
2  
3 542 63. Márquez MA, Galiana L, Oliver A, et al. The impact of a mindfulness-based intervention on the  
4 543 quality of life of Spanish national police officers. *Health Soc Care Community* 2021;29(5):1491-  
5 544 501. doi: 10.1111/hsc.13209  
6 545 64. Hofmann L, Glaesmer H, Przyrembel M, et al. An Evaluation of a Suicide Prevention E-Learning  
7 546 Program for Police Officers (COPS): Improvement in Knowledge and Competence. *Front*  
8 547 *Psychiatry* 2021;12 doi: 10.3389/fpsy.2021.770277  
9 548 65. Galanis P, Fragkou D, Katsoulas TA. Risk factors for stress among police officers: A systematic  
10 549 literature review. *Work* 2021;68:1255-72. doi: 10.3233/WOR-213455  
11 550 66. Marcos A, García-Ael C, Topa G. The Influence of Work Resources, Demands, and Organizational  
12 551 Culture on Job Satisfaction, Organizational Commitment, and Citizenship Behaviors of Spanish  
13 552 Police Officers. *Int J Environ Res Public Health* 2020;17(20):7607. doi: 10.3390/ijerph17207607  
14  
15  
16 553  
17  
18

**FIGURE LEGENDS**

- 19 554  
20  
21 555 Figure 1: Participant flow chart across measurement points. Percentages in parentheses indicate  
22 556 response rates.  
23  
24 557 Figure 2: Profile plot of time and gender interaction for work-life balance ( $N = 116$ ).  
25  
26 558 Figure 3: Profile plot of time and gender interaction for job satisfaction ( $N = 116$ ).  
27  
28 559 Figure 4: Profile plot of time and gender interaction for quality of life ( $N = 116$ ).  
29  
30  
31  
32  
33  
34  
35  
36  
37  
38  
39  
40  
41  
42  
43  
44  
45  
46  
47  
48  
49  
50  
51  
52  
53  
54  
55  
56  
57  
58  
59  
60

1  
2  
3  
4  
5  
6  
7  
8  
9  
10  
11  
12  
13  
14  
15  
16  
17  
18  
19  
20  
21  
22  
23  
24  
25  
26  
27  
28  
29  
30  
31  
32  
33  
34  
35  
36  
37  
38  
39  
40  
41  
42  
43  
44  
45  
46  
47  
48  
49  
50  
51  
52  
53  
54  
55  
56  
57  
58  
59  
60

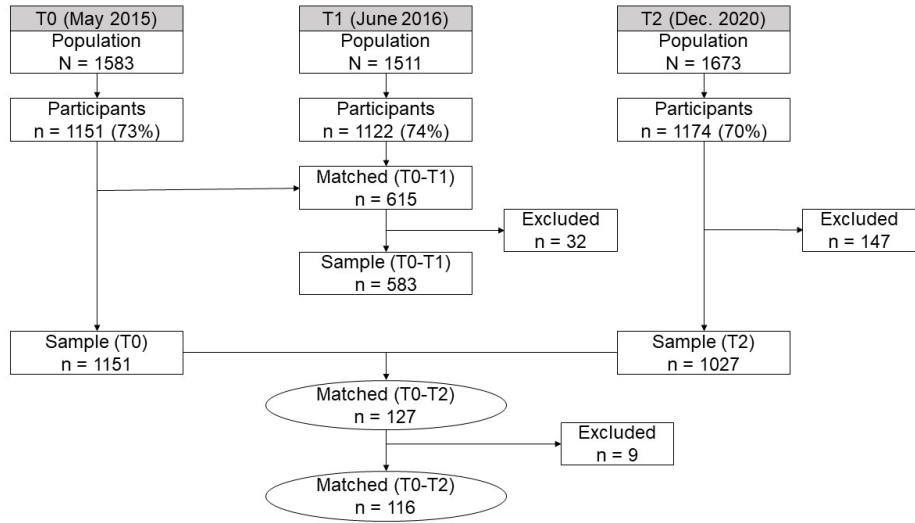

Figure 1: Participant flow chart across measurement points. Percentages in parentheses indicate response rates.

338x190mm (96 x 96 DPI)

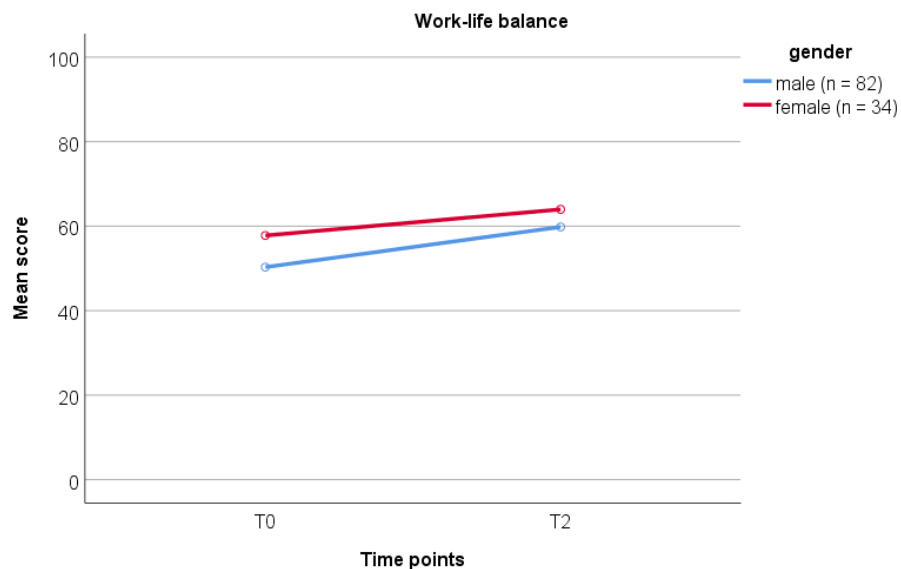

Figure 2. Profile plot of time and gender interaction for work-life balance (N = 116).

568x334mm (38 x 38 DPI)

1  
2  
3  
4  
5  
6  
7  
8  
9  
10  
11  
12  
13  
14  
15  
16  
17  
18  
19  
20  
21  
22  
23  
24  
25  
26  
27  
28  
29  
30  
31  
32  
33  
34  
35  
36  
37  
38  
39  
40  
41  
42  
43  
44  
45  
46  
47  
48  
49  
50  
51  
52  
53  
54  
55  
56  
57  
58  
59  
60

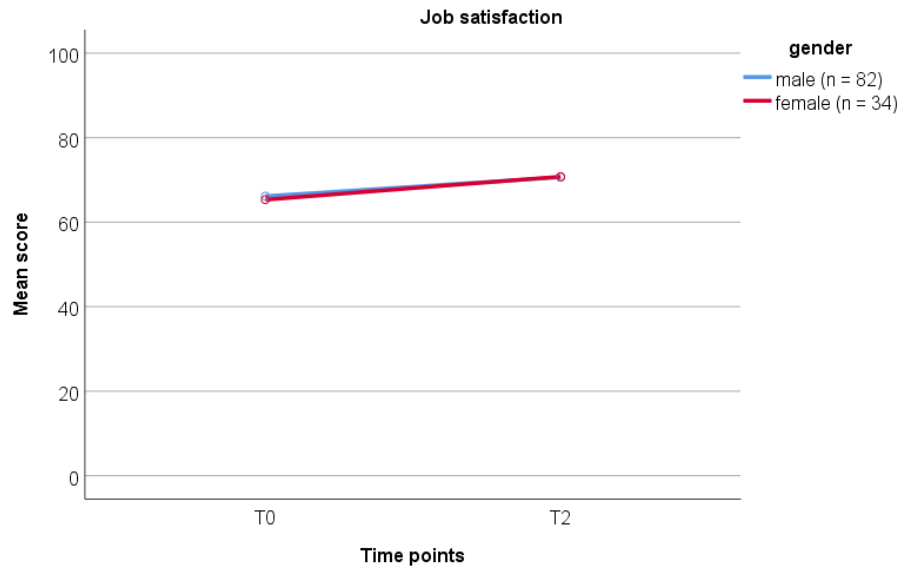

Figure 3. Profile plot of time and gender interaction for job satisfaction (N = 116).

568x334mm (38 x 38 DPI)

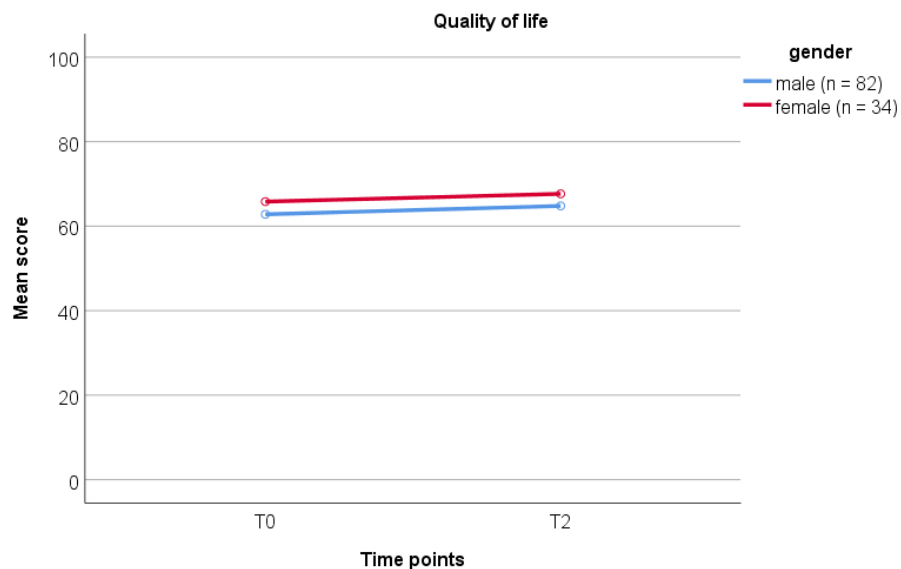

Figure 4. Profile plot of time and gender interaction for quality of life (N = 116).

568x334mm (38 x 38 DPI)

## POLICE OFFICERS' WORK-LIFE BALANCE

## 1 SUPPLEMENTARY MATERIALS

2 **Table S1. Comparison of previous and new shift schedule over an eight-week period.**

| Recommendations                                                 | Previous shift schedule                         | New shift schedule                              |
|-----------------------------------------------------------------|-------------------------------------------------|-------------------------------------------------|
| Number of consecutive night shifts (< 3)                        | 1 night shift                                   | 2 night shifts                                  |
| Rest period as long as possible after night shift phase (> 24h) | Yes                                             | Yes                                             |
| Blocked weekend breaks better than single days off              | no free weekend                                 | 1 free weekend                                  |
| Days off per rotation                                           | 2 days off (without "sleep-in days")            | 14 days off (without "sleep-in days")           |
| Forward rotation better than backward rotation                  | Forward rotation                                | Forward rotation                                |
| Start early shift not before 6:00 a.m.                          | 5:30 a.m.                                       | 6:00 a.m.                                       |
| End night shift as early as possible                            | 5:45 a.m.                                       | 6:00 a.m.                                       |
| Flexibility for the individual worker                           | No                                              | No                                              |
| Avoid excessive daily working hours                             | 4 x 12-hour shifts (Sundays only)               | 14 x 12-hour shifts                             |
| Further characteristics of shift schedules                      | including 40 hours for free shifts              | including 39 hours for free shifts              |
|                                                                 | 360 hours including duty instructions and sport | 359 hours including duty instructions and sport |
|                                                                 | 40 duties                                       | 35 duties                                       |

3 *Note.* Recommendations based on German Social Accident Insurance (Paridon et al., 2012, p. 136)<sup>1</sup>.

4 Light grey indicates conformity, dark grey indicates non-conformity with recommendation.



## POLICE OFFICERS' WORK-LIFE BALANCE

5 **Table S2. Means and standard deviations for work-life balance, job satisfaction and quality of life at all three points of measurement.**

| Variables         | T0 (N = 1151 <sup>1</sup> ) |         |        |        | T1 (N = 1122 <sup>2</sup> ) |         |        |        | T2 (N = 1027 <sup>3</sup> ) |         |        |        |
|-------------------|-----------------------------|---------|--------|--------|-----------------------------|---------|--------|--------|-----------------------------|---------|--------|--------|
|                   | Min                         | Max     | M      | SD     | Min                         | Max     | M      | SD     | Min                         | Max     | M      | SD     |
| Work-life balance | .000                        | 100.000 | 48.880 | 22.023 | .000                        | 100.000 | 52.805 | 23.967 | .000                        | 100.000 | 61.257 | 19.884 |
| Job satisfaction  | 4.714                       | 100.000 | 60.629 | 13.009 | 4.714                       | 100.000 | 62.360 | 11.864 | .000                        | 100.000 | 69.439 | 12.372 |
| Quality of life   | .000                        | 100.000 | 59.846 | 19.943 | .000                        | 100.000 | 64.436 | 19.451 | .000                        | 100.000 | 67.929 | 18.185 |

6 Note. <sup>1</sup>T0: Work-life balance  $n = 1121$ , job satisfaction  $n = 1108$ , quality of life  $n = 1149$ . <sup>2</sup>T1: Work-life balance  $n = 1091$ , job satisfaction  $n = 1075$ , quality of life  
7  $n = 1117$ . <sup>3</sup>T2: Work-life balance  $n = 1002$ , job satisfaction  $n = 989$ , quality of life  $n = 102$

POLICE OFFICERS' WORK-LIFE BALANCE

8 References

9 1. Paridon H, Ernst S, Harth V, et al. DGUV Report 1/2012: Schichtarbeit. Rechtslage, gesundheitliche  
10 Risiken und Präventionsmöglichkeiten [DGUV Report 1/2012: Shift work. Legal situation,  
11 health risks and prevention options] Berlin: Deutsche Gesetzliche Unfallversicherung (DGUV);  
12 2012 [Available from: <https://publikationen.dguv.de/widgets/pdf/download/article/2554>  
13 accessed 8 February 2022].

For peer review only

**STROBE 2007 (v4) Statement—Checklist of items that should be included in reports of *cohort studies***

| Section/Topic                | Item # | Recommendation                                                                                                                                                                       | Reported on page # |
|------------------------------|--------|--------------------------------------------------------------------------------------------------------------------------------------------------------------------------------------|--------------------|
| <b>Title and abstract</b>    | 1      | (a) Indicate the study's design with a commonly used term in the title or the abstract                                                                                               | <u>21</u>          |
|                              |        | (b) Provide in the abstract an informative and balanced summary of what was done and what was found                                                                                  | <u>22</u>          |
| <b>Introduction</b>          |        |                                                                                                                                                                                      |                    |
| Background/rationale         | 2      | Explain the scientific background and rationale for the investigation being reported                                                                                                 | 3-4                |
| Objectives                   | 3      | State specific objectives, including any prespecified hypotheses                                                                                                                     | 4                  |
| <b>Methods</b>               |        |                                                                                                                                                                                      |                    |
| Study design                 | 4      | Present key elements of study design early in the paper                                                                                                                              | 5                  |
| Setting                      | 5      | Describe the setting, locations, and relevant dates, including periods of recruitment, exposure, follow-up, and data collection                                                      | 5                  |
| Participants                 | 6      | (a) Give the eligibility criteria, and the sources and methods of selection of participants. Describe methods of follow-up                                                           | 5                  |
|                              |        | (b) For matched studies, give matching criteria and number of exposed and unexposed                                                                                                  | 5-6                |
| Variables                    | 7      | Clearly define all outcomes, exposures, predictors, potential confounders, and effect modifiers. Give diagnostic criteria, if applicable                                             | 5-6                |
| Data sources/<br>measurement | 8*     | For each variable of interest, give sources of data and details of methods of assessment (measurement). Describe comparability of assessment methods if there is more than one group | 5-6                |
| Bias                         | 9      | Describe any efforts to address potential sources of bias                                                                                                                            | <u>109</u>         |
| Study size                   | 10     | Explain how the study size was arrived at                                                                                                                                            | 5-6                |
| Quantitative variables       | 11     | Explain how quantitative variables were handled in the analyses. If applicable, describe which groupings were chosen and why                                                         | 6                  |
| Statistical methods          | 12     | (a) Describe all statistical methods, including those used to control for confounding                                                                                                | <u>6-7</u>         |
|                              |        | (b) Describe any methods used to examine subgroups and interactions                                                                                                                  | <u>6-7</u>         |
|                              |        | (c) Explain how missing data were addressed                                                                                                                                          | 6                  |
|                              |        | (d) If applicable, explain how loss to follow-up was addressed                                                                                                                       | 5                  |
|                              |        | (e) Describe any sensitivity analyses                                                                                                                                                | 6                  |
| <b>Results</b>               |        |                                                                                                                                                                                      | <u>106</u>         |

|                          |     |                                                                                                                                                                                                              |                    |
|--------------------------|-----|--------------------------------------------------------------------------------------------------------------------------------------------------------------------------------------------------------------|--------------------|
| Participants             | 13* | (a) Report numbers of individuals at each stage of study—eg numbers potentially eligible, examined for eligibility, confirmed eligible, included in the study, completing follow-up, and analysed            | 5                  |
|                          |     | (b) Give reasons for non-participation at each stage                                                                                                                                                         | 5                  |
|                          |     | (c) Consider use of a flow diagram                                                                                                                                                                           | 5                  |
| Descriptive data         | 14* | (a) Give characteristics of study participants (eg demographic, clinical, social) and information on exposures and potential confounders                                                                     | 7-8                |
|                          |     | (b) Indicate number of participants with missing data for each variable of interest                                                                                                                          | 7-8                |
|                          |     | (c) Summarise follow-up time (eg, average and total amount)                                                                                                                                                  | 98                 |
| Outcome data             | 15* | Report numbers of outcome events or summary measures over time                                                                                                                                               | 98                 |
| Main results             | 16  | (a) Give unadjusted estimates and, if applicable, confounder-adjusted estimates and their precision (eg, 95% confidence interval). Make clear which confounders were adjusted for and why they were included | Not applicable     |
|                          |     | (b) Report category boundaries when continuous variables were categorized                                                                                                                                    | Not applicable     |
|                          |     | (c) If relevant, consider translating estimates of relative risk into absolute risk for a meaningful time period                                                                                             | Not applicable     |
| Other analyses           | 17  | Report other analyses done—eg analyses of subgroups and interactions, and sensitivity analyses                                                                                                               | 9-10               |
| <b>Discussion</b>        |     |                                                                                                                                                                                                              |                    |
| Key results              | 18  | Summarise key results with reference to study objectives                                                                                                                                                     | 10                 |
| <b>Limitations</b>       |     |                                                                                                                                                                                                              |                    |
| Interpretation           | 20  | Give a cautious overall interpretation of results considering objectives, limitations, multiplicity of analyses, results from similar studies, and other relevant evidence                                   | 10-12 <del>1</del> |
| Generalisability         | 21  | Discuss the generalisability (external validity) of the study results                                                                                                                                        | 11-12              |
| <b>Other information</b> |     |                                                                                                                                                                                                              |                    |
| Funding                  | 22  | Give the source of funding and the role of the funders for the present study and, if applicable, for the original study on which the present article is based                                                | 146                |

\*Give information separately for cases and controls in case-control studies and, if applicable, for exposed and unexposed groups in cohort and cross-sectional studies.

**Note:** An Explanation and Elaboration article discusses each checklist item and gives methodological background and published examples of transparent reporting. The STROBE checklist is best used in conjunction with this article (freely available on the Web sites of PLoS Medicine at <http://www.plosmedicine.org/>, Annals of Internal Medicine at <http://www.annals.org/>, and Epidemiology at <http://www.epidem.com/>). Information on the STROBE Initiative is available at [www.strobe-statement.org](http://www.strobe-statement.org).
