# Supplementary material for: Police officers’ work–life balance, job satisfaction and quality of life: longitudinal effects after changing the shift schedule
Source: HighWire-hosted journal article supplement (doi:10.1136/bmjopen-2022-063302), 2022-09-01
Supplement: bmjopen-2022-063302supp001_data_supplement.pdf [file bmjopen-2022-063302supp001_data_supplement.pdf]

## POLICE OFFICERS' WORK-LIFE BALANCE, JOB SATISFACTION AND QUALITY OF LIFE

## SUPPLEMENTARY MATERIALS

**Table S1. Comparison of previous and new shift schedule over an eight-week period.**

| Recommendations                                                 | Previous shift schedule                         | New shift schedule                              |
|-----------------------------------------------------------------|-------------------------------------------------|-------------------------------------------------|
| Number of consecutive night shifts (< 3)                        | 1 night shift                                   | 2 night shifts                                  |
| Rest period as long as possible after night shift phase (> 24h) | Yes                                             | Yes                                             |
| Blocked weekend breaks better than single days off              | no free weekend                                 | 1 free weekend                                  |
| Days off per rotation                                           | 2 days off (without "sleep-in days")            | 14 days off (without "sleep-in days")           |
| Forward rotation better than backward rotation                  | Forward rotation                                | Forward rotation                                |
| Start early shift not before 6:00 a.m.                          | 5:30 a.m.                                       | 6:00 a.m.                                       |
| End night shift as early as possible                            | 5:45 a.m.                                       | 6:00 a.m.                                       |
| Flexibility for the individual worker                           | No                                              | No                                              |
| Avoid excessive daily working hours                             | 4 x 12-hour shifts (Sundays only)               | 14 x 12-hour shifts                             |
| Further characteristics of shift schedules                      | including 40 hours for free shifts              | including 39 hours for free shifts              |
|                                                                 | 360 hours including duty instructions and sport | 359 hours including duty instructions and sport |
|                                                                 | 40 duties                                       | 35 duties                                       |

Note. Recommendations based on German Social Accident Insurance (Paridon et al., 2012, p. 136)<sup>1</sup>. Light grey indicates conformity, dark grey indicates non-conformity with recommendation.

## POLICE OFFICERS' WORK-LIFE BALANCE, JOB SATISFACTION AND QUALITY OF LIFE

**Table S2. Means and standard deviations for work-life balance, job satisfaction and quality of life at all three points of measurement.**

| Variables         | T0 (N = 1151 <sup>1</sup> ) |         |        |        | T1 (N = 1122 <sup>2</sup> ) |         |        |        | T2 (N = 1027 <sup>3</sup> ) |         |        |        |
|-------------------|-----------------------------|---------|--------|--------|-----------------------------|---------|--------|--------|-----------------------------|---------|--------|--------|
|                   | Min                         | Max     | M      | SD     | Min                         | Max     | M      | SD     | Min                         | Max     | M      | SD     |
| Work-life balance | .000                        | 100.000 | 48.880 | 22.023 | .000                        | 100.000 | 52.805 | 23.967 | .000                        | 100.000 | 61.257 | 19.884 |
| Job satisfaction  | 4.714                       | 100.000 | 60.629 | 13.009 | 4.714                       | 100.000 | 62.360 | 11.864 | .000                        | 100.000 | 69.439 | 12.372 |
| Quality of life   | .000                        | 100.000 | 59.846 | 19.943 | .000                        | 100.000 | 64.436 | 19.451 | .000                        | 100.000 | 67.929 | 18.185 |

Note. <sup>1</sup>T0: Work-life balance  $n = 1121$ , job satisfaction  $n = 1108$ , quality of life  $n = 1149$ . <sup>2</sup>T1: Work-life balance  $n = 1091$ , job satisfaction  $n = 1075$ , quality of life  $n = 1117$ . <sup>3</sup>T2: Work-life balance  $n = 1002$ , job satisfaction  $n = 989$ , quality of life  $n = 102$

## References

1. Paridon H, Ernst S, Harth V, et al. DGUV Report 1/2012: Schichtarbeit. Rechtslage, gesundheitliche Risiken und Präventionsmöglichkeiten [DGUV Report 1/2012: Shift work. Legal situation, health risks and prevention options] Berlin: Deutsche Gesetzliche Unfallversicherung (DGUV); 2012 [Available from: <https://publikationen.dguv.de/widgets/pdf/download/article/2554> accessed 8 February 2022].
